1 **Assembly of a young vertebrate Y chromosome reveals convergent signatures of sex**  
2 **chromosome evolution**

3  
4  
5 Catherine L. Peichel<sup>1,2</sup>  
6 Shaugnessy R. McCann<sup>1</sup>  
7 Joseph A. Ross<sup>1,3</sup>  
8 Alice F. S. Naftaly<sup>4</sup>  
9 James R. Urton<sup>1,3</sup>  
10 Jennifer N. Cech<sup>1,3</sup>  
11 Jane Grimwood<sup>5</sup>  
12 Jeremy Schmutz<sup>5</sup>  
13 Richard M. Myers<sup>5</sup>  
14 David M. Kingsley<sup>6</sup>  
15 Michael A. White<sup>1,4</sup>

16  
17 <sup>1</sup>Divisions of Human Biology and Basic Sciences, Fred Hutchinson Cancer Research Center,  
18 Seattle, Washington 98109, USA

19 <sup>2</sup>Institute of Ecology and Evolution, University of Bern, 3012 Bern, Switzerland

20 <sup>3</sup>Graduate Program in Molecular and Cellular Biology, University of Washington, Seattle,  
21 Washington 98195, USA

22 <sup>4</sup>Department of Genetics, University of Georgia, Athens 30602, Georgia, USA

23 <sup>5</sup>HudsonAlpha Institute for Biotechnology, Huntsville, Alabama 35806, USA

24 <sup>6</sup>Department of Developmental Biology and Howard Hughes Medical Institute, Stanford University  
25 School of Medicine, Stanford, California 94305, USA

26  
27  
28 Corresponding authors:

29  
30 Catherine L. Peichel  
31 Institute of Ecology and Evolution  
32 University of Bern  
33 Baltzerstrasse 6  
34 3012 Bern, Switzerland  
35 catherine.peichel@iee.unibe.ch

36  
37 Michael A. White  
38 Department of Genetics  
39 University of Georgia  
40 120 Green St.  
41 Athens, GA 30601  
42 USA  
43 whitem@uga.edu

44  
45  
46 **Running title:** Threespine stickleback Y chromosome assembly

47  
48 **Keywords:** threespine stickleback, Y chromosome, gene duplication, sex determination

49

## 50 **Abstract**

51 Heteromorphic sex chromosomes have evolved repeatedly across diverse species. Suppression  
52 of recombination between X and Y chromosomes leads to rapid degeneration of the Y  
53 chromosome. However, these early stages of degeneration are not well understood, as complete  
54 Y chromosome sequence assemblies have only been generated across a handful of taxa with  
55 ancient sex chromosomes. Here we describe the assembly of the threespine stickleback  
56 (*Gasterosteus aculeatus*) Y chromosome, which is less than 26 million years old. Our previous  
57 work identified that the non-recombining region between the X and the Y spans ~17.5 Mb on the  
58 X chromosome. Here, we combined long-read PacBio sequencing with a Hi-C-based proximity  
59 guided assembly to generate a 15.87 Mb assembly of the Y chromosome. Our assembly is  
60 concordant with cytogenetic maps and Sanger sequences of over 90 Y chromosome clones from  
61 a bacterial artificial chromosome (BAC) library. We found three evolutionary strata on the Y  
62 chromosome, consistent with the three inversions identified by our previous cytogenetic analyses.  
63 The young threespine stickleback Y shows convergence with older sex chromosomes in the  
64 retention of haploinsufficient genes and the accumulation of genes with testis-biased expression,  
65 many of which are recent duplicates. However, we found no evidence for large amplicons found  
66 in other sex chromosome systems. We also report an excellent candidate for the master sex-  
67 determination gene: a translocated copy of *Amh* (*Amhy*). Together, our work shows that the same  
68 evolutionary forces shaping older sex chromosomes can cause remarkably rapid changes in the  
69 overall genetic architecture on young Y chromosomes.

70

## 71 **Introduction**

72 Sex chromosomes evolve from autosomal ancestors when recombination is suppressed  
73 between the homologous pairs (reviewed in Bachtrog 2013). Thus, sex chromosomes are an  
74 intriguing region of the genome to understand how mutations and repetitive DNA accumulate in  
75 the absence of recombination and how gene content evolves once a chromosome becomes sex-

76 limited. Y chromosomes were once thought to be an evolutionary dead end, inevitably losing  
77 functional gene copies across the entire chromosome as deleterious mutations quickly  
78 accumulate (Griffin 2012). Contrary to this expectation, assembly of multiple mammalian Y  
79 chromosome sequences (Skaletsky et al. 2003; Hughes et al. 2010; 2012; Bellott et al. 2014; Soh  
80 et al. 2014), the chicken W chromosome (Bellott et al. 2017), and an invertebrate Y chromosome  
81 (Mahajan et al. 2018) has revealed that the sequence of the sex-limited chromosome is much  
82 more dynamic, punctuated by gene gains and losses, rather than becoming entirely degenerated.

83         Although short-read sequencing of sex chromosomes has yielded insight into how  
84 ancestral single-copy genes have evolved between X and Y chromosomes (e.g. Zhou et al. 2014;  
85 Papadopulos et al. 2015; White et al. 2015), these approaches cannot be used to study how Y  
86 chromosomes have structurally evolved. Short-reads cannot span many of the lengthy repeat  
87 units characteristic of Y chromosomes, leading to a collapse of these regions during the assembly  
88 process. Because of the inherent difficulty in assembling these highly repetitive regions of the  
89 genome, Y chromosomes have been omitted from many reference genome assemblies. The few  
90 existing reference Y chromosome assemblies were constructed through labor intensive, iterative  
91 Sanger sequencing of large inserts from bacterial artificial chromosome (BAC) libraries (Skaletsky  
92 et al. 2003; Hughes et al. 2010; 2012; Soh et al. 2014), recently supplemented by a combination  
93 of Pacific Biosciences long-read sequencing, chromatin interaction maps, and optical mapping  
94 (Mahajan et al. 2018).

95         Through these assemblies, two classes of genes have been identified on ancient sex  
96 chromosomes. The first are dosage-sensitive genes that were present in the common ancestor  
97 of both chromosomes and have been maintained as single copies on the Y chromosome across  
98 multiple mammalian lineages (Bellott et al. 2014; Cortez et al. 2014) as well as on the  
99 degenerating W chromosome of birds (Bellott et al. 2017). The second are genes that exist in  
100 high copy number families on Y chromosomes and generally have gene expression patterns  
101 restricted to the testes, suggesting roles in spermatogenesis (Skaletsky et al. 2003; Murphy et al.

102 2006; Hughes et al. 2010; Paria et al. 2011; Soh et al. 2014; Janečka et al. 2018). It is clear that  
103 the genetic architecture of sex chromosomes can be shaped by multiple processes over long  
104 evolutionary time scales. However, in many species sex chromosomes can be much younger,  
105 due to the frequent turnover of the linkage groups controlling sex determination (e.g. Ross et al.  
106 2009; Kitano and Peichel 2012; Bachtrog et al. 2014; Blackmon and Demuth 2014; Myosho et al.  
107 2015; Jeffries et al. 2018). Reference assemblies of young sex chromosomes are largely absent,  
108 with the exception of the young neo-Y chromosome assembly of *Drosophila miranda* (Mahajan et  
109 al. 2018; Ellison and Bachtrog 2019), making it unclear whether the genetic architecture of newly  
110 evolving sex chromosomes is rapidly shaped by these evolutionary forces or if it is a phenomenon  
111 unique to ancient sex chromosomes.

112         The threespine stickleback fish (*Gasterosteus aculeatus*) is an excellent model system to  
113 explore the early structural evolution of sex chromosomes. Although the threespine stickleback  
114 has a high-quality reference genome assembly (Jones et al. 2012) that has gone through multiple  
115 iterations of refinement (Roesti et al. 2013; Glazer et al. 2015; Peichel et al. 2017), the assembly  
116 was derived from a female fish, precluding the Y chromosome from assembly. The threespine  
117 stickleback has a relatively young X/Y sex chromosome system that is shared across the  
118 *Gasterosteus* genus but not with other species in the Gasterosteidae family and therefore evolved  
119 less than 26 million years ago (Bell et al. 2009; Kitano et al. 2009; Ross et al. 2009; Varadharajan  
120 et al. 2019) (compared to the Y chromosome of mammals that evolved ~180 million years ago  
121 (Bellott et al. 2014; Cortez et al. 2014)). Crossing over is suppressed between the X and Y  
122 chromosomes over a majority of their length, resulting in an approximately 2.5 Mb  
123 pseudoautosomal region of the 20.6 Mb X chromosome (Roesti et al. 2013). The region of  
124 suppressed crossing over is coincident with three pericentric inversions that differentiate the X  
125 and Y chromosomes (Ross and Peichel 2008). Illumina-based sequencing suggested the non-  
126 crossover region on the Y chromosome was composed of two differently aged evolutionary strata,  
127 the oldest of which retained genes that were predicted to be haploinsufficient (White et al. 2015),

128 similar to mammals. However, all studies in threespine stickleback have relied on mapping short-  
129 reads to the reference X chromosome, limiting our understanding to regions conserved between  
130 the X and Y. It has not yet been possible to explore how unique structure and sequence is evolving  
131 across this young Y chromosome.

132 Here, we report the first high-quality reference assembly of a young vertebrate Y  
133 chromosome. We combined high-coverage, long-read sequencing with chromatin conformation  
134 capture sequencing (Hi-C) to assemble a full scaffold of the threespine stickleback Y  
135 chromosome. Our assembly is completely concordant with more than 90 Sanger sequenced  
136 inserts from a bacterial artificial chromosome (BAC) library and with a known cytogenetic map  
137 (Ross and Peichel 2008). Throughout the male-specific region we have identified several novel  
138 sequence and structural characteristics that parallel patterns observed on more ancient sex  
139 chromosome systems. The young sex chromosome of threespine stickleback is a useful model  
140 system to understand how the genetic architecture of sex-limited chromosomes initially evolves.

141

## 142 **Results**

### 143 **De novo assembly of the threespine stickleback Y chromosome**

144 We used high-coverage PacBio long-read sequencing to assemble a threespine  
145 stickleback genome from a male fish of the Paxton Lake Benthic population (British Columbia,  
146 Canada). Raw read coverage was approximately 75.25x across the genome (34.84 Gb total  
147 sequence) (Supplemental Table 1). The longest raw PacBio reads were assembled using the  
148 Canu pipeline, refined by Arrow, resulting in a primary contig assembly of 622.30 Mb across 3,593  
149 contigs (Supplemental Table 1). This assembly size was considerably larger than the Hi-C revised  
150 threespine stickleback female genome assembly (463.04 Mb including autosomes and X  
151 chromosome) (Jones et al. 2012; Glazer et al. 2015; Peichel et al. 2017). The increased assembly  
152 length was largely due to heterozygous loci being separated into individual alleles (haplotigs).  
153 3,134 contigs (574.67 Mb) of the total Canu assembly aligned to 442.41 Mb of autosomes in the

154 reference assembly. Only 129 contigs partially aligned to the genome (less than 25% of the contig  
155 length aligned; 10.15 Mb) and 148 contigs did not align at all to the genome (3.58 Mb). We  
156 collapsed 118.89 Mb of haplotigs, reducing the 574.67 Mb alignment to 455.78 Mb of non-  
157 redundant sequence across the autosomes, an estimate closer to the 442.41 Mb of autosomes  
158 in the female reference genome assembly.

159 We targeted Y-linked contigs in the Canu assembly by identifying contigs that shared  
160 sequence homology with the reference X chromosome or did not align to the autosomes. In the  
161 youngest region of the threespine stickleback sex chromosomes (the previously identified stratum  
162 two), the X and Y chromosomes still share considerable sequence homology. However, within  
163 this stratum, heterozygosity is even higher than what is observed across the autosomes (White  
164 et al. 2015). Based on this divergence, Canu should separate X- and Y-linked contigs during the  
165 initial assembly process. Contigs aligned to the X chromosome formed a distribution of sequence  
166 identity that was not unimodal, reflecting the presence of both X- and Y-linked contigs  
167 (Supplemental Figure 1). Setting a sequence identity threshold of 96% resulted in a set of 114 X-  
168 linked contigs that totaled 21.26 Mb, compared to the previous 20.62 Mb X chromosome  
169 reference assembly. There were 68 putative Y-linked contigs that had a sequence identity less  
170 than or equal to 96%, totaling 12.64 Mb. The oldest region of the Y chromosome (stratum 1)  
171 contains many regions that have either been deleted or have diverged to such an extent that  
172 sequencing reads cannot be mapped to this region (White et al. 2015). Consequently, there may  
173 be contigs unique to the Y chromosome that cannot be captured through alignments to the  
174 reference X chromosome. To account for these loci, we also included the contigs that only partially  
175 aligned to the genome (less than 25% of the contig length aligned; 129 contigs; 10.15 Mb) or did  
176 not align at all to the genome (148 contigs; 3.58 Mb) in the set of putative Y-linked contigs (345  
177 total contigs).

178

179 **Hi-C proximity-guided assembly yielded contiguous scaffolds of the sex chromosomes**

180 We used chromosome conformation capture (Hi-C) sequencing and a proximity-guided  
181 method to assemble the set of putative X- and Y-linked contigs into scaffolds. Using the 3D-DNA  
182 assembler (Dudchenko et al. 2017), 105 of the 114 X-linked contigs were combined into three  
183 main scaffolds that totaled 20.78 Mb. The scaffolds were largely colinear with the reference X  
184 chromosome, with scaffolds one and two aligning to the pseudoautosomal region and scaffold  
185 three mostly aligning to the remainder of the X chromosome that does not recombine with the Y  
186 (Supplemental Figure 2).

187 We assembled the putative Y-linked contigs using the same process. Of the 345 total  
188 contigs, 115 were initially combined into a single primary scaffold that totaled 17.15 Mb. We  
189 visually inspected the Hi-C interaction map for any sign of misassembled contigs. There was a  
190 clear mis-joining of contigs near one end of the primary scaffold, where there were fewer short-  
191 range Hi-C interactions at the diagonal combined with an overall absence of long-range Hi-C  
192 interactions between all of the contigs in this region and the remainder of the Y scaffold  
193 (Supplemental Figure 3). We manually removed this cluster of contigs from the primary scaffold  
194 (45 contigs; 1.86 Mb), resulting in an initial Y chromosome scaffold totaling 15.28 Mb across 70  
195 contigs (Figure 1A).

196

### 197 **Bacterial artificial chromosome library sequences are concordant with the assembled Y** 198 **chromosome**

199 To assess the overall accuracy of our assembly, we compared our assembly to Sanger  
200 sequenced inserts from a bacterial artificial chromosome (BAC) library constructed from males  
201 from the same population. Mean insert size among the 101 sequenced BAC clones was 168.13  
202 kb, similar in size to the average contig length within the Y chromosome scaffolds (217.85 kb).  
203 Using the BAC sequences, we were able to identify whether any of the contigs within the scaffold  
204 contain collapsed haplotigs between the X and Y chromosome (mosaic contigs should contain

**A**

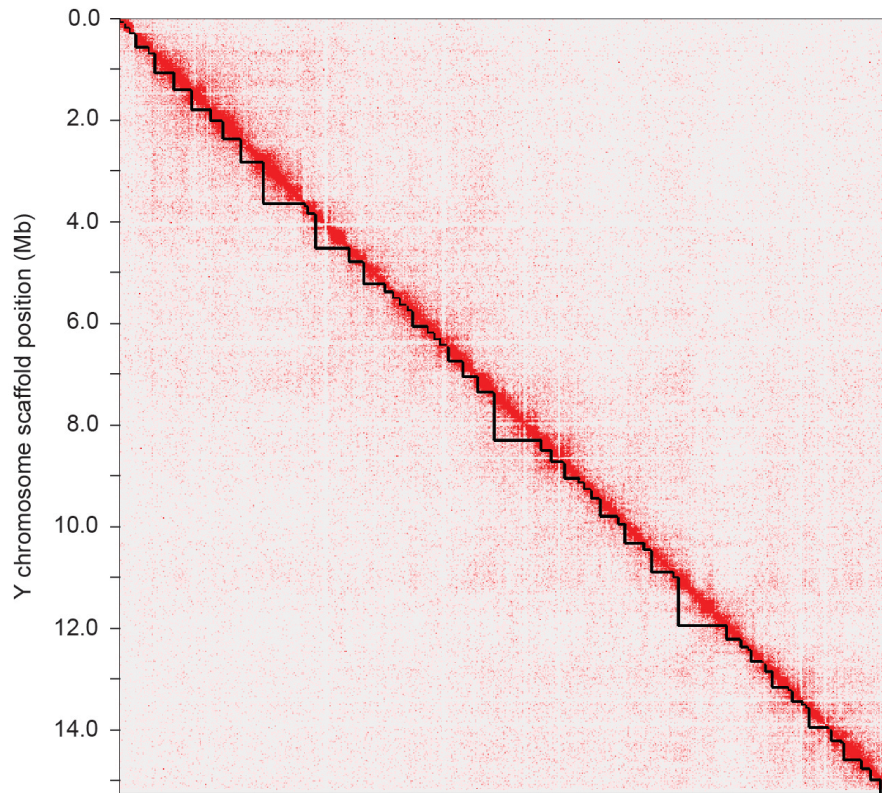

**B**

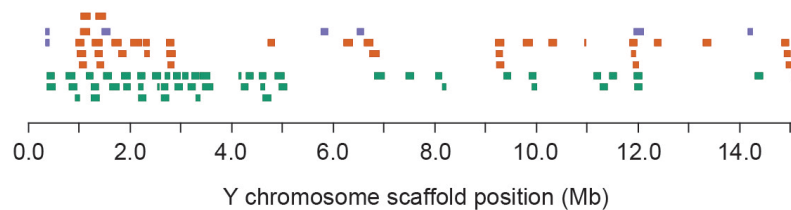

**Figure 1.** Hi-C chromosome conformation capture sequencing generated a single Y chromosome scaffold. (A) The contact matrix shows an enrichment of interactions between contigs in close proximity along the diagonal. Contig boundaries in the assembly are denoted by the black triangles along the diagonal. (B) Sanger sequenced BAC inserts that align concordantly throughout the scaffold are shown, with BACs that spanned gaps between contigs in orange, BACs that extended into, but did not span gaps in purple, and BACs that were contained completely within an individual contig in green.

205 reduced sequence identity when aligned to known Y chromosome BAC contigs). In addition, the  
206 contig ordering across the scaffold was verified by BAC contig sequences that spanned gaps in  
207 the assembly. We aligned all 101 sequenced BAC contigs to the Y chromosome scaffold and  
208 found 92 of the BAC contigs aligned concordantly with the assembly (Figure 1B). These BACs  
209 aligned to 40 of the 70 contigs in the assembly with a high sequence identity (7.72 Mb of non-



210 overlapping sequence in the 15.28 Mb assembly aligned concordantly to the BAC contigs). The  
211 remaining 9 BAC contigs that did not align concordantly indicate there are small-scale structural  
212 differences between the Canu Y chromosome assembly and the BAC clones derived from a  
213 separate Paxton Lake male threespine stickleback, either reflecting errors in the Y chromosome  
214 assembly, rearrangements in the BAC clone sequences, or true polymorphisms segregating in  
215 the Paxton Lake benthic population. Four of the discordant BACs aligned to regions of the  
216 reference Y that were greater than the Sanger sequenced length of the BAC insert, suggesting  
217 possible indels. The remaining five discordant BACs contained sub alignments with mixed  
218 orientations, suggesting possible small-scale inversions not present in our assembly.

219         Among the aligned BAC contigs, many provided additional sequence information, either  
220 spanning gaps between contigs in the Y chromosome assembly or extending from contigs into  
221 gaps in the assembly. Of the 92 BAC contigs that aligned concordantly, seven BAC contigs  
222 extended into five different gaps in the assembly and 35 BAC contigs spanned 18 different gaps  
223 in the assembly (26% of the total gaps in the assembly) (Figure 1B). The remainder of the aligned  
224 BAC contigs aligned completely within an individual contig in the Y assembly. We merged this  
225 additional sequence into the initial Y chromosome assembly, resulting in a merged Y chromosome  
226 scaffold that contained 52 contigs, totaling 15.78 Mb.

227

## 228 **The Y chromosome assembly is concordant with known cytogenetic maps**

229         The threespine stickleback Y chromosome has undergone at least three pericentric  
230 inversions relative to the X chromosome, forming a non-crossover region that spans a majority of  
231 the chromosome in males (Ross and Peichel 2008). These inversions were mapped by ordering  
232 a series of cytogenetic markers along both the X and Y chromosomes (Figure 2A). To determine  
233 whether our Y chromosome assembly was consistent with the known cytogenetic marker  
234 ordering, we used BLAST to locate the position of each marker within the assembly. We were  
235 able to locate four of the five markers used from the male-specific region in our assembly. The

236 position of these cytogenetic markers was concordant with our assembly (Figure 2B). The missing  
237 marker in the non-crossover region (*STN235*) likely reflects a region of our Y reference that is not  
238 fully assembled or it is a true deletion within the Paxton Lake benthic population, relative to the  
239 Pacific Ocean marine population used for the cytogenetic map (Ross and Peichel 2008).

240 The location of the oldest region within the Y chromosome (the previously identified  
241 stratum one) had been ambiguous. Cytogenetic markers from this region could not be hybridized

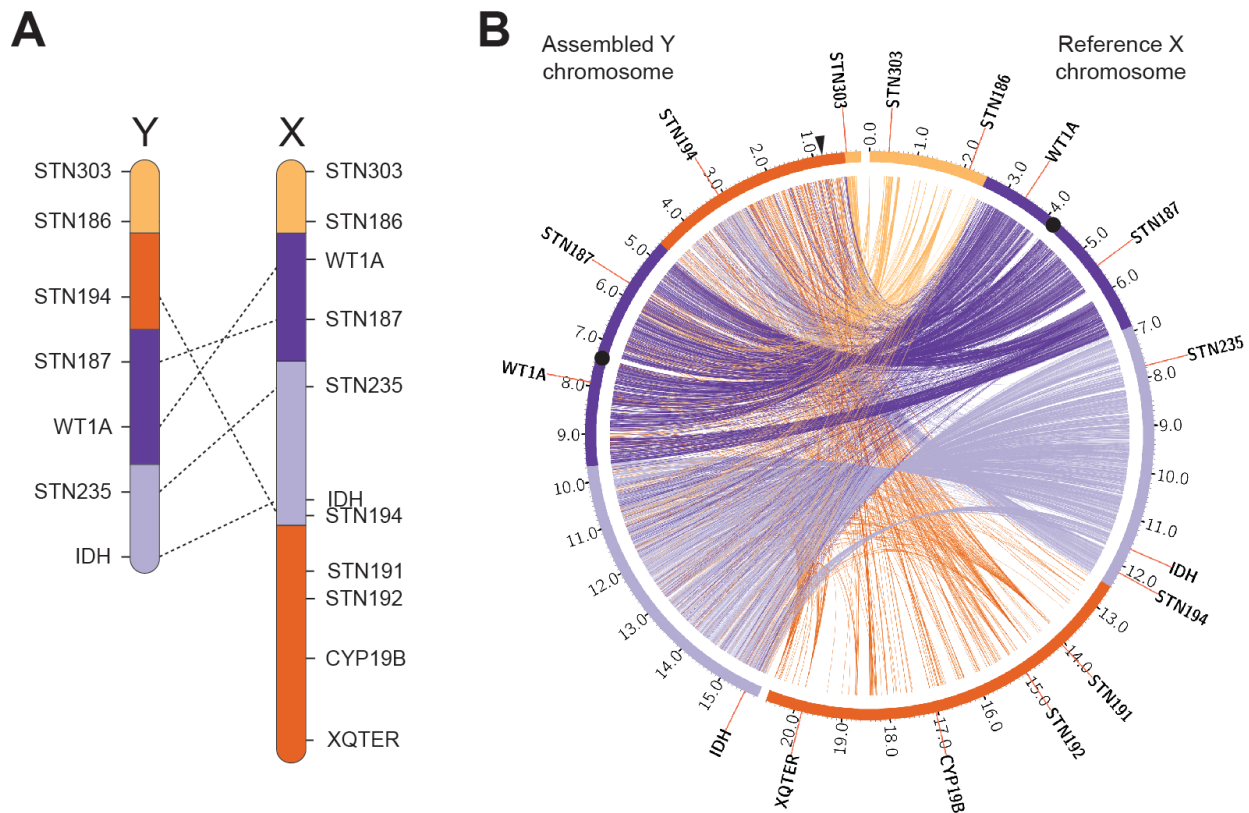

**Figure 2.** The threespine stickleback Y chromosome assembly is concordant with cytogenetic maps. (A) The Y chromosome has diverged from the X chromosome through a series of inversions determined through ordering of cytogenetic markers (dashed lines indicate rearrangements of the linear order of markers (Ross and Peichel 2008)). (B) Alignments of the assembled Y chromosome (left) to the X chromosome (right) reveal the same inversions in the *de novo* assembly. Stratum one is indicated by orange, stratum two is indicated by dark purple, stratum three is indicated by light purple, and the pseudoautosomal region is indicated by yellow. A majority of the pseudoautosomal region is not included in the reference Y chromosome assembly because this region was not targeted (see methods). The location of the candidate sex determination gene (*Amhy*) is indicated by the black arrow. Centromeres are shown by black circles. Positions are shown in megabases.

242 to the Y chromosome (Ross and Peichel 2008), suggesting this region may be largely deleted or  
243 highly degenerated. Subsequent work using Illumina short-read sequencing revealed that some  
244 genes from this region were still present on the Y chromosome under strong purifying selection,  
245 but the location of these genes within the Y could not be determined by mapping reads to the X  
246 chromosome (White et al. 2015). The cytogenetic marker, *ldh*, is located at the distal end of our  
247 Y chromosome assembly, remarkably consistent with the placement of *ldh* in the cytogenetic map  
248 (Ross and Peichel 2008), indicating stratum one is no longer located at the distal end of the Y  
249 chromosome as it is on the X chromosome. Instead, we found a high density of stratum one  
250 alignments near the boundary of the pseudoautosomal region at the opposite end of the  
251 chromosome (Figure 2B). Within this stratum, there was an overall lower density of alignments  
252 between the X and Y chromosome, consistent with previous patterns mapping Illumina short  
253 reads to the reference X chromosome (White et al. 2015). The placement of stratum one in the  
254 assembly was consistent with the hybridization of fluorescent *in situ* hybridization probes,  
255 designed from stratum one BAC inserts. These probes clearly hybridized to the chromosome end  
256 opposite of *ldh* (Supplemental Figure 4).

257         Because we were primarily focused on sequences that were highly divergent from the X  
258 chromosome or absent from the female reference genome entirely, our strategy did not target the  
259 pseudoautosomal region for assembly into the Y chromosome. Nevertheless, our assembly did  
260 place a small fraction of the ~2.5 Mb pseudoautosomal region on the distal end of the male-  
261 specific Y chromosome, adjacent to stratum one. The cytogenetic marker *STN303* was included  
262 in this region, which is located on the opposite end of the pseudoautosomal region on the X  
263 chromosome (Figure 2). This discordance in marker placement within the pseudoautosomal  
264 region likely indicates a mis-assembly of the region. The pseudoautosomal region contains  
265 repetitive sequence, complicating overall assembly of the region (see transposable elements  
266 section). Indeed, the contigs spanning this region and *STN303* have a smaller size (five contigs;

267 median: 88,098 bp) than the remaining contigs within the Y chromosome or X chromosome,  
268 consistent with highly heterozygous, repetitive sequence.

269

### 270 **The location of centromeric repeats are concordant with a metacentric chromosome**

271 A 186 bp centromeric AT-rich alpha satellite repeat was previously identified in female fish  
272 by chromatin immunoprecipitation followed by sequencing (ChIP-seq) (Cech and Peichel 2015).  
273 Although this repeat hybridized strongly to autosomes and the X chromosome, there was only  
274 weak hybridization of the probe to the Y chromosome, suggesting the Y chromosome might have  
275 a divergent centromeric repeat and/or contain substantially less satellite DNA than the autosomes  
276 (Cech and Peichel 2015). We used ChIP-seq with the same antibody against centromere protein  
277 A (CENP-A) in males to identify any Y chromosome repeats. Relative to the input DNA, we found  
278 strong enrichment of reads from the immunoprecipitation mapping to the center of the Y  
279 chromosome assembly, indicative of CENP-A binding (Figure 3A; Supplemental Figure 5). The  
280 enrichment was located between cytogenetic markers *STN187* and *WT1A*, consistent with the  
281 predicted location of the centromere in the cytogenetic map and the metacentric chromosome  
282 morphology in karyotypes (Ross and Peichel 2008). These results further confirm the ordering of  
283 contigs within our Y chromosome scaffold.

284 Underlying the CENP-A peak, we found a core centromere AT-rich repeat. We identified  
285 14 copies of the repeat in our Y chromosome assembly, which shared an average pairwise  
286 sequence identity of 84.6% with the core repeat that hybridized to the remainder of the genome  
287 (Cech and Peichel 2015) (Supplemental Figure 6). The repeats fell at the edges of a gap,  
288 indicating that a majority of the repeats were not assembled into our primary scaffold. Uneven  
289 coverage signal in Hi-C libraries from repetitive DNA can trigger the 3D-DNA assembler to remove  
290 these regions from contigs during the editing step (Durand et al. 2016; Dudchenko et al. 2017).  
291 Consistent with this, both contigs that flanked the centromere gap in the Y chromosome assembly  
292 had additional sequence that was removed by the 3D-DNA pipeline as “debris.” The first contig

293 that was adjacent to the gap (contig 11894) contained six copies of the repeat and had an  
294 additional 57,692 bp that was removed as “debris.” The second contig on the opposite side of the

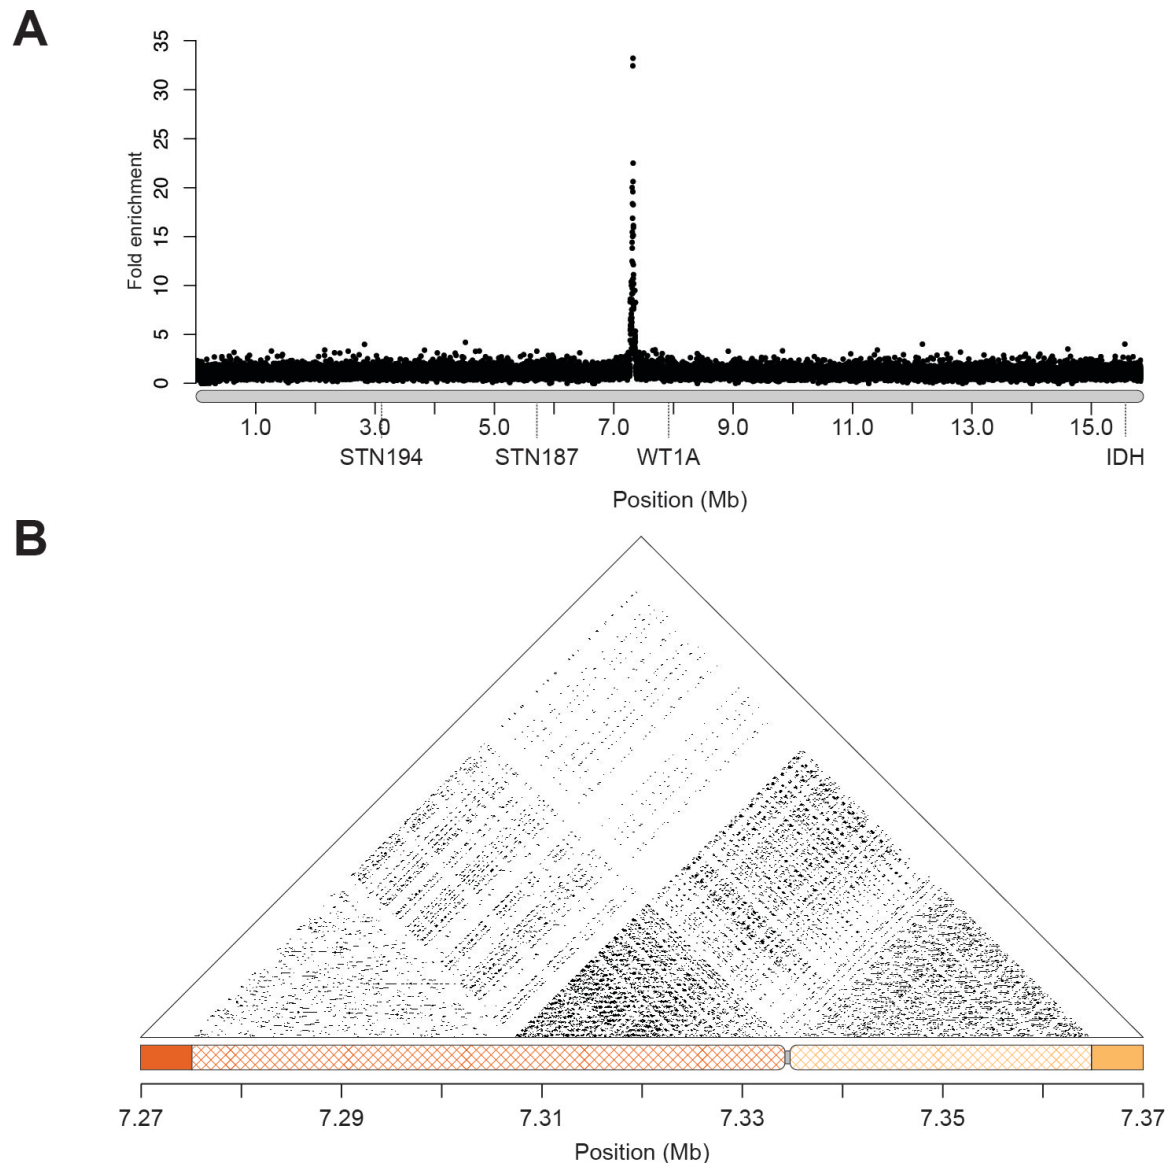

**Figure 3.** Sequences immunoprecipitated with CENP-A are enriched at the center of the chromosome. (A) Short-read sequences from a chromatin-immunoprecipitation (ChIP-seq) with CENP-A were aligned to the reference Y chromosome assembly. There is a prominent peak between markers STN187 and WT1A where the centromere is located in cytogenetic maps (Ross and Peichel 2008). CENP-A enrichment from a second male fish is shown in Supplemental Figure 5. (B) Alpha satellite monomeric repeats are organized into higher order repeats (HORs). Sequence identity is shown in 100 bp windows across the centromere sequence of the Y chromosome. 87 kb of sequence containing the monomeric repeat was rejoined (crosshatched) to contigs that were previously fragmented in the scaffolding process (orange contig: 11894; yellow contig: 11839). The gap between the two contigs is shown in grey.

295 gap (contig 11839) had eight copies of the repeat and an additional 29,308 bp of sequence that  
296 was removed as “debris.” We used BLAST to search for additional repeats in the debris using the  
297 majority consensus sequence of the 14 previously identified centromere repeats in the Y  
298 assembly. There were an additional 304 repeats in the debris sequence from contig 11894, and  
299 163 repeats in the debris sequence from contig 11839. We added the debris sequence back into  
300 the total Y chromosome assembly, increasing the assembled centromere size by 87 kb (total Y  
301 chromosome length: 15.87 Mb) (Figure 3B). Average pairwise percent sequence identity among  
302 all monomeric repeats in the Y chromosome assembly was 89.5%. Compared to the core  
303 threespine stickleback centromere repeat previously identified, the Y chromosome centromere  
304 repeat was more divergent. Average pairwise percent sequence identity between all the motifs in  
305 the Y chromosome assembly and the centromere repeat identified from female fish was only  
306 86.8%.

307 Centromeres are often composed of highly similar blocks of monomeric repeats,  
308 organized into higher order repeats (HORs) (Alexandrov et al. 1993; McNulty and Sullivan 2018;  
309 Hartley and O’Neill 2019). Previous characterization of the monomeric centromere repeat in  
310 threespine stickleback did not reveal a HOR organization; however, this analysis was limited by  
311 the identification of only a few short stretches of the monomeric repeat on each autosome (Cech  
312 and Peichel 2015). The ~87 kb of assembled centromere on the Y shows a clear higher order  
313 patterning around the centromeric region, consistent with complex HORs (Figure 3B).

314

### 315 **The Y chromosome has three evolutionary strata**

316 Previous estimates of synonymous site divergence ( $d_s$ ) in coding regions have indicated  
317 there are two evolutionary strata on the threespine stickleback sex chromosomes (White et al.  
318 2015), despite the presence of at least three major inversion events in the cytogenetic map of the  
319 sex chromosomes (Ross and Peichel 2008). Because these estimates relied on aligning short-  
320 read Illumina sequences to the reference X chromosomes, overall divergence could have been

321 biased by mapping artifacts, especially in the oldest region of the Y chromosome. We investigated  
322 whether our Y chromosome assembly supported the earlier model of two evolutionary strata or  
323 whether there could be additional strata uncovered in the current *de novo* assembly. We aligned  
324 all ENSEMBL predicted X chromosome coding regions outside of the pseudoautosomal region to  
325 the Y chromosome reference assembly to estimate divergence. Of the 1187 annotated coding  
326 sequences, we were able to align 504 (42.5%) to the male-specific region of the Y chromosome.  
327 We found a clear signature of three evolutionary strata, consistent with inversion breakpoints  
328 within the cytogenetic map as well as within our *de novo* reference assembly. The oldest stratum

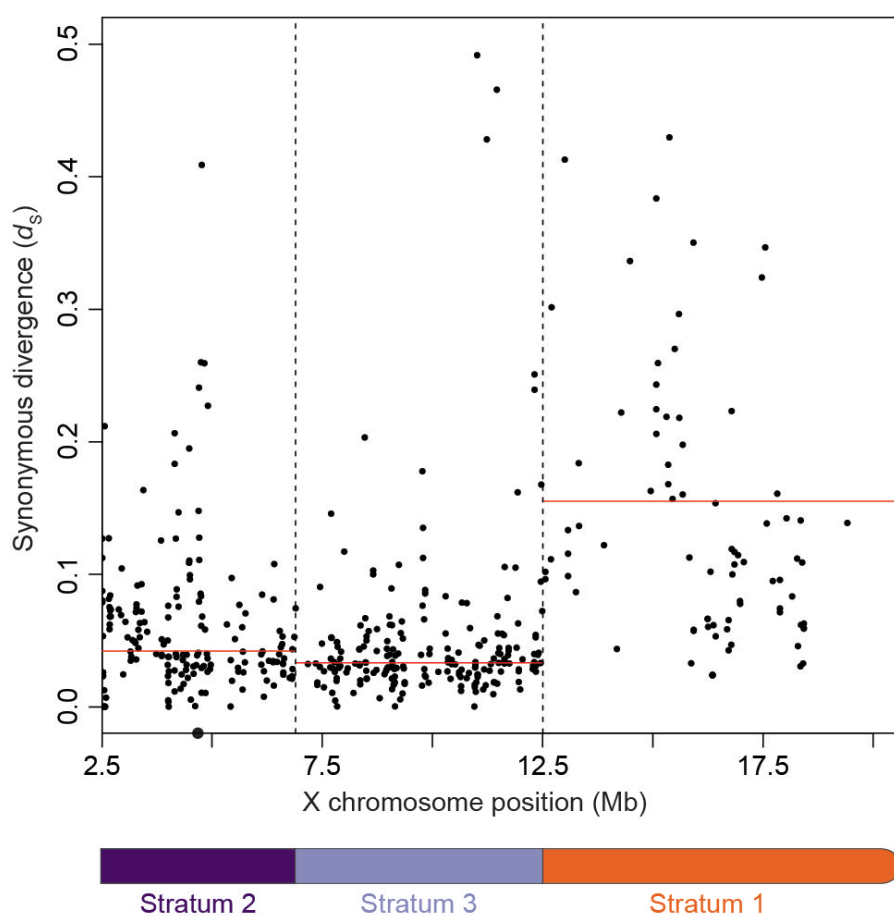

**Figure 4.** The sex chromosomes have three distinct evolutionary strata. Synonymous divergence ( $d_s$ ) between the X and Y chromosome was estimated for every annotated transcript on the X chromosome. Genes are ordered by position on the X chromosome (Mb). Median divergence across each region is shown by the red line; values are given in Table 2. Strata breakpoints are indicated by the vertical dashed lines. The centromere is indicated by a black circle.

329 (stratum one) encompassed the same region of the X chromosome as previously described in  
330 the Illumina-based study and had highly elevated  $d_s$  (stratum one median  $d_s$ : 0.155). In contrast  
331 to the Illumina-based estimates, our new assembly revealed that the remainder of coding regions  
332 across the X chromosome formed two distinct strata, with different estimates of  $d_s$  (Figure 4;  
333 Table 1). We also investigated whether the older strata had increased non-synonymous  
334 divergence ( $d_N$ ) consistent with inefficient selection from the lack of crossing over between the  
335 chromosomes (Charlesworth 1978; Rice 1987). As predicted, stratum one had a significantly  
336 higher  $d_N$  than strata two and three (Table 1). Stratum two had a significantly lower  $d_N$  than the  
337 other strata. This was also reflected by a significantly lower  $d_N/d_s$  ratio (Table 1), suggesting genes  
338 in stratum two are under stronger purifying selection.

339

#### 340 **The Y chromosome is evolving a unique genetic architecture**

341 Haploinsufficient genes have been repeatedly retained on degenerating sex  
342 chromosomes of mammals and birds (Bellott et al. 2014; 2017), and may be enriched in stratum  
343 one of the stickleback Y chromosome (White et al. 2015). We explored whether our expanded set  
344 of annotated genes exhibited signatures of haploinsufficiency by identifying orthologs between  
345 the X-annotated genes and human genes ranked for haploinsufficiency (Decipher  
346 Haploinsufficiency Predictions (DHP) v. 3) (Firth et al. 2009; Huang et al. 2010). Within strata one  
347 and two, we found orthologs with a retained Y-linked allele had lower DHP scores than genes  
348 without a Y ortholog, indicating that retained genes were more likely to exhibit haploinsufficiency

**Table 1.** Nucleotide divergence between X and Y chromosome homologs.

|                  | <b>X genes</b> | <b>Y genes</b> | <b>Percent remaining on Y</b> | <b><math>d_s</math></b> | <b><math>d_N</math></b> | <b><math>d_N/d_s</math></b> |
|------------------|----------------|----------------|-------------------------------|-------------------------|-------------------------|-----------------------------|
| <b>Stratum 1</b> | 612            | 110            | 18.0%                         | 0.155 <sup>a</sup>      | 0.030 <sup>a</sup>      | 0.287 <sup>a</sup>          |
| <b>Stratum 2</b> | 243            | 179            | 73.7%                         | 0.042 <sup>b</sup>      | 0.008 <sup>b</sup>      | 0.198 <sup>b</sup>          |
| <b>Stratum 3</b> | 332            | 215            | 64.8%                         | 0.033 <sup>c</sup>      | 0.011 <sup>c</sup>      | 0.338 <sup>a</sup>          |

<sup>a,b,c</sup> Groups significantly different by a pairwise Mann-Whitney U Test;  $P < 0.05$



349 (Figure 5; Mann-Whitney U Test; stratum one  $P < 0.001$ ; stratum two  $P = 0.035$ ). We found a  
350 similar trend for genes retained on the Y chromosome in stratum three, but this result was not  
351 significant (Figure 5; Mann-Whitney U Test;  $P = 0.085$ ). Nevertheless, this lower score suggests  
352 enrichment for haploinsufficient genes may already be underway within the youngest region of  
353 the Y chromosome.

354 Genes can be acquired on the Y chromosome through duplications from autosomes  
355 (reviewed in Gvozdev et al. 2005), a process that has had a prominent impact on the overall gene  
356 content of ancient sex chromosomes (Saxena et al. 1996; Lahn and Page 1999; Carvalho et al.  
357 2001; Skaletsky et al. 2003; Mahajan and Bachtrog 2017; Tobler et al. 2017; Chang and  
358 Larracunte 2018), but the overall influence of this process on the genetic architecture of newly  
359 evolving sex chromosomes has not been documented. To identify whether the young stickleback

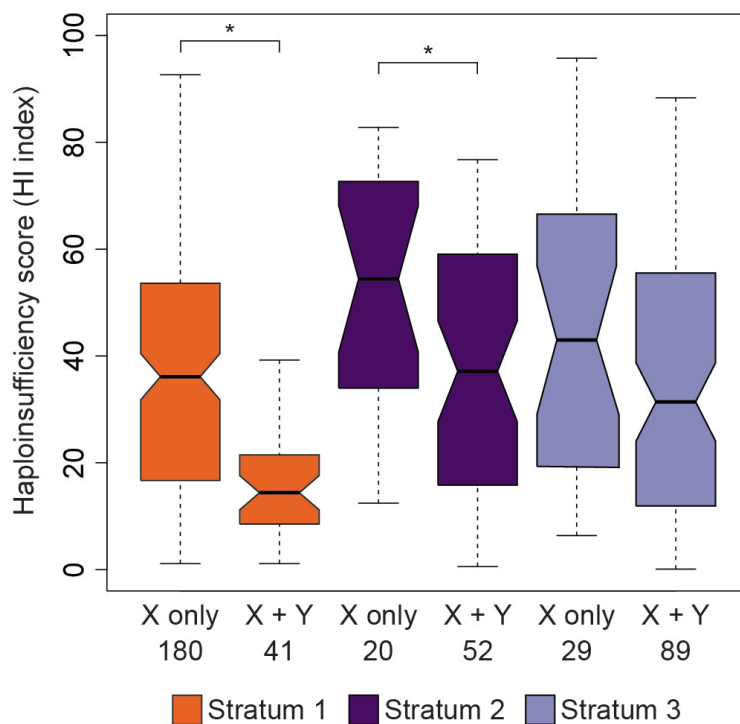

**Figure 5.** Genes retained on the Y chromosome in strata one and two are more likely to exhibit haploinsufficiency. Human proteins with predicted haploinsufficiency indexes, in which a lower value indicates that a gene is more likely to be haploinsufficient, were matched to one-to-one human-threespine stickleback fish orthologs from the X chromosome. Haploinsufficiency indexes were significantly lower for genes retained on both the X and Y chromosomes than for genes present only on the X chromosome (i.e. lost from the Y chromosome) in both strata one and two. Asterisks indicate  $P < 0.05$  (Mann-Whitney U test).

360 Y chromosome also contained genes shared with autosomes, but not the X chromosome, we first  
 361 used the MAKER gene annotation pipeline (Cantarel et al. 2008; Holt and Yandell 2011) to  
 362 assemble a complete set of coding regions across the Y chromosome reference sequence. We  
 363 identified a total of 626 genes across the male-specific region of the Y chromosome, 33 of which  
 364 had paralogs on autosomes, but not on the X chromosome (5.3%) (Table 2). A majority of these  
 365 genes (25 of 33; 75.8%) appeared to have undergone duplications within the Y chromosome  
 366 following translocation from the autosomes (genes had copy numbers ranging from two to six).  
 367 Gene translocation onto sex chromosomes can occur through RNA-mediated mechanisms  
 368 (retrogenes) or through DNA-based translocations (reviewed in Long et al. 2013). Of the  
 369 stickleback genes that had multiple introns within the autosomal homolog (31 of 33 genes), we  
 370 did not detect a single paralog on the Y chromosome that had a complete loss of introns.

371 Genes that accumulate on Y chromosomes are predicted to have male beneficial  
 372 functions. On many ancient sex chromosomes, genes that have translocated to the Y  
 373 chromosome from autosomes exhibit testis-biased expression (Saxena et al. 1996; Lahn and  
 374 Page 1999; Skaletsky et al. 2003). suggesting important roles in spermatogenesis. To determine  
 375 whether the translocated genes on the threespine stickleback Y chromosome are enriched for  
 376 male functions, we looked for testis-biased gene expression between testis tissue and three other  
 377 tissues (liver, brain, and larvae). Compared with all tissues, we found stronger testis-biased  
 378 expression among the genes that translocated to the Y chromosome, compared to the single-  
 379 copy genes with a homolog on the X chromosome (Figure 6; Mann-Whitney U Test;  $P < 0.05$ ).  
 380 Because DNA-based translocations of genes often contain their native regulatory elements, we

**Table 2.** Origin of genes in each stratum on the Y chromosome.

|                  | X ancestral,<br>Y single copy | X ancestral,<br>Y duplicated | Autosomal,<br>Y single copy | Autosomal,<br>Y duplicated | Unknown<br>origin,<br>Y single copy | Unknown<br>origin, Y<br>duplicated | Total |
|------------------|-------------------------------|------------------------------|-----------------------------|----------------------------|-------------------------------------|------------------------------------|-------|
| <b>Stratum 1</b> | 114 (72.6%)                   | 14 (9.0%)                    | 3 (1.9%)                    | 6 (3.8%)                   | 19 (12.1%)                          | 1 (0.6%)                           | 157   |
| <b>Stratum 2</b> | 154 (80.6%)                   | 11 (5.8%)                    | 2 (1.0%)                    | 11 (5.8%)                  | 11 (5.8%)                           | 2 (1.0%)                           | 191   |
| <b>Stratum 3</b> | 233 (83.8%)                   | 22 (7.9%)                    | 3 (1.1%)                    | 8 (2.9%)                   | 11 (4.0%)                           | 1 (0.3%)                           | 278   |

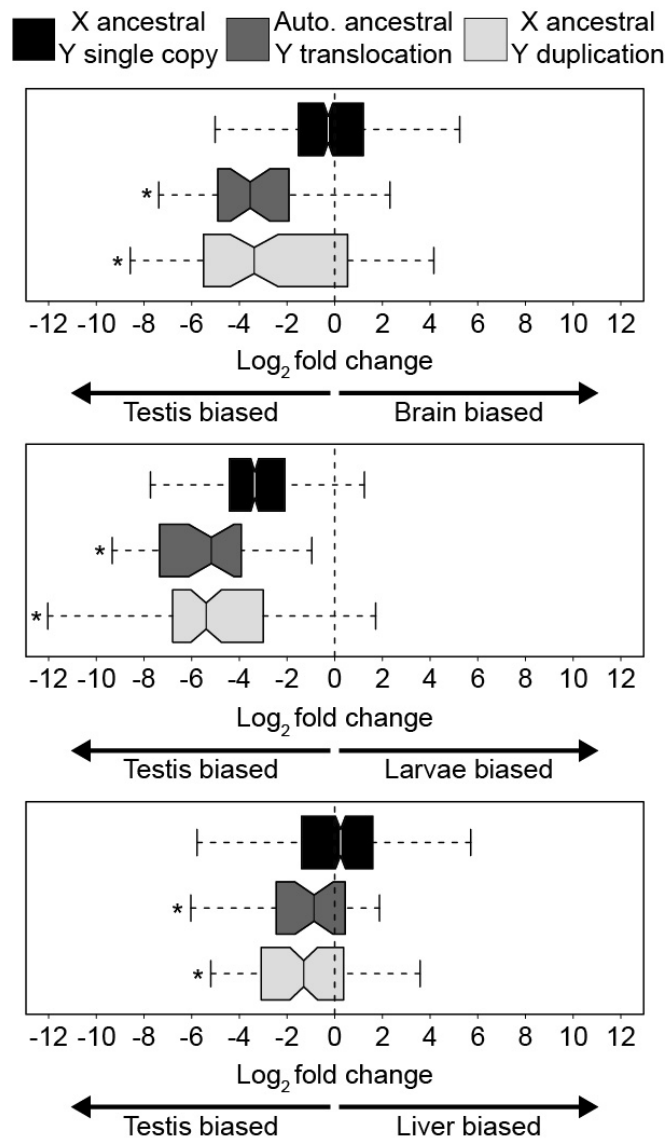

**Figure 6.** Genes present on the Y that have been translocated from the autosomes or genes that have been duplicated on the Y and are derived from ancestral X-linked homologs show testis-biased gene expression. Log<sub>2</sub> fold change between testis tissue and three other tissues (brain, larvae, and liver) is shown. For each tissue comparison, asterisks denote groups with significantly different expression from single-copy genes present on the Y that are derived from X-linked homologs (Mann-Whitney U Test;  $P < 0.05$ ).

381 examined whether the autosomal paralogs also exhibited testis-biased expression to a similar  
382 degree as the Y-linked paralogs. Consistent with this pattern, we observed a similar degree of  
383 testis-biased expression between testis and liver tissue among the ancestral paralogs on the  
384 autosomes (median translocated genes Log<sub>2</sub> fold change: -0.867; median ancestral autosomal  
385 paralog Log<sub>2</sub> fold change: -1.558; Mann-Whitney U test,  $P = 0.818$ ). This pattern did not hold for

386 comparisons between testis and larvae (Median translocated genes Log<sub>2</sub> fold change: -5.178;  
387 Median ancestral autosomal paralog Log<sub>2</sub> fold change: -1.371; Mann-Whitney U Test  $P < 0.001$ )  
388 and testis and brain (Median translocated genes Log<sub>2</sub> fold change: -3.548; Median ancestral  
389 autosomal paralog Log<sub>2</sub> fold change: -1.601; Mann-Whitney U Test  $P = 0.036$ ). Combined, our  
390 results indicate that the genes which translocated to the Y chromosome and were retained often  
391 had testis-biased expression ancestrally.

392 Duplicated genes on the Y chromosome can also be derived from ancestral genes shared  
393 between the X and Y. Of the 626 genes annotated across the male-specific region of the Y  
394 chromosome, 47 (7.5%) had greater than one copy on the Y chromosome and also had an X-  
395 linked allele (Table 2). None of these genes were structured within large amplicons, which are  
396 characteristic of many mammalian Y chromosomes (Skaletsky et al. 2003; Hughes et al. 2010;  
397 2012; Li et al. 2013; Soh et al. 2014; Skinner et al. 2016; Brashear et al. 2018; Janečka et al.  
398 2018). Instead, copy number ranged from two to seven copies total. We explored if this duplicated  
399 class of genes also exhibited testis-based expression similar to what we observed with the  
400 autosome translocated genes. Consistent with the previous patterns, we found strong testis-  
401 biased expression between testis and all other tissues among duplicated genes that have an X-  
402 linked homolog (Figure 6; Mann-Whitney U Test;  $P < 0.001$ , all comparisons). Similar to the  
403 ancestral autosomal paralogs, we found that genes often exhibited testis-biased expression  
404 ancestrally on the X chromosome before duplicating on the Y (Supplemental Table 2). However,  
405 this pattern did not hold in all tissue comparisons. In some cases, genes exhibited stronger testis-  
406 biased expression after duplicating on the Y chromosome.

407

#### 408 **Transposable elements have accumulated throughout the Y chromosome**

409 Transposable elements also rapidly accumulate on sex chromosomes once  
410 recombination is suppressed (reviewed in Bachtrog 2013). The threespine stickleback Y  
411 chromosome has a higher density of transposable elements throughout the male-specific region

412 of the Y chromosome, compared to the X chromosome (Supplemental Figure 7). We found the  
413 highest densities within stratum one, consistent with recombination being suppressed in this  
414 region for the greatest amount of time. We also found a high density of transposable elements  
415 within the recombining pseudoautosomal region (Supplemental Figure 7).

416

#### 417 **Stratum one contains a candidate sex determination gene**

418 The master sex determination gene has not been identified in the threespine stickleback.  
419 Although master sex determination genes can be highly variable among species (Bachtrog et al.  
420 2014; Capel 2017), many species of fish share some common genes that have been co-opted  
421 into this role during the independent evolution of Y chromosomes. For instance, orthologs of both  
422 the anti-Müllerian hormone (*Amhy*) (Hattori et al. 2012; Li et al. 2015; Pan et al. 2019) as well as  
423 the anti-Müllerian hormone receptor (*Amhr2*) (Kamiya et al. 2012) have been used as the master  
424 sex determination gene in multiple species of fish. We searched for evidence of these genes  
425 among the annotated transcripts on the Y chromosome. We found the complete coding sequence  
426 of the anti-Müllerian hormone on the Y chromosome (hereafter referred to as *Amhy*), located  
427 within the oldest stratum adjacent to the pseudoautosomal region boundary (positions 817,433 -  
428 821,230) We did not locate an allele on the X chromosome, suggesting *Amhy* is an ancient  
429 duplication and translocation from autosome eight.

430 We explored whether *Amhy* had divergence patterns and expression patterns consistent  
431 with a functional role in sex determination. We aligned the protein coding sequence of AMHY to  
432 the threespine stickleback AMH paralog on autosome eight as well as to other vertebrate AMH  
433 proteins. We observed conservation of amino acids in the AMH and TGF- $\beta$  domains of the protein  
434 sequence on the Y chromosome paralog that are conserved across vertebrates (Supplemental  
435 Figure 8), suggesting the Y chromosome paralog is under selection in these regions to preserve  
436 function. We surveyed expression patterns of *Amhy* across the six tissues used in the gene  
437 annotations, including a larval tissue collected around the time sex determination is believed to

438 occur (stages 22-26 (Swarup 1958; Lewis et al. 2008)). *Amhy* expression was significantly higher  
439 in larval tissue compared to brain ( $\text{Log}_2$  fold change: -2.031; FDR = 0.012), but expression was  
440 statistically indistinguishable when compared to testis ( $\text{Log}_2$  fold change: -0.284; FDR = 0.918) or  
441 liver ( $\text{Log}_2$  fold change: -2.054; FDR = 0.052). Additional functional genetics work is currently  
442 underway to test if this gene is necessary and sufficient for initiating male development.

443

## 444 **Discussion**

### 445 **Evolution of the threespine stickleback Y chromosome**

446 Using a combination of long-read sequencing and chromosome conformation capture (Hi-  
447 C) sequencing for scaffolding, we were able to assemble a highly accurate Y chromosome  
448 reference assembly for the threespine stickleback, concordant with sequenced BAC inserts and  
449 known cytogenetic markers (Ross and Peichel 2008). Our new reference assembly revealed  
450 several patterns of sequence evolution that were not accurately resolved using short-read  
451 sequencing (White et al. 2015). First, synonymous divergence was underestimated throughout  
452 the Y chromosome by relying on single nucleotide polymorphisms ascertained through short-read  
453 sequencing. This effect was greatest in the oldest region of the Y chromosome (stratum one).  
454 Median  $d_s$  was approximately 8.7-fold greater within stratum one when long-read sequences were  
455 used. Synonymous divergence was approximately 2.8-fold greater across the younger strata in  
456 the new reference assembly compared to the  $d_s$  estimates from short-read sequencing. The short-  
457 read sequencing was also unable to distinguish two independent strata within this region, likely  
458 from an insufficient signal caused by underestimating the true number of SNPs in the region. Our  
459 results argue for caution in using short-read sequencing technologies to characterize sex-specific  
460 regions of Y or W chromosomes.

461 Divergence times for each of the strata can be approximated based on divergence rates  
462 between the threespine stickleback fish and the ninespine stickleback fish (*Pungitius pungitius*),  
463 which last shared a common ancestor as many as 26 million years ago (Bell et al. 2009; Ross et

464 al. 2009; Varadharajan et al. 2019). Combined with a mean genome-wide estimate of  
465 synonymous divergence between the two species (0.184; Guo et al. 2013), we determined  
466 stratum one likely arose less than 21.9 million years ago, close to when the two species diverged.  
467 Using the same calibration, stratum two formed less than 5.9 million years ago and stratum three  
468 formed less than 4.7 million years ago.

469 Our complete scaffold of the Y chromosome allowed us to refine the previous evolutionary  
470 model that suggested the Y chromosome diverged from the X chromosome through three  
471 pericentric inversions (Ross and Peichel 2008). Our new model requires four independent  
472 inversions to incorporate the placement of stratum one that was unaccounted for in the original  
473 cytogenetic map (Supplemental Figure 9). The first inversion in our model involved only stratum  
474 one at the end of the sex chromosomes, whereas the final inversion in our model occurred after  
475 all the strata had formed, inverting the entire male-specific region of the Y chromosome. This final  
476 inversion moved the candidate sex determination gene, *Amhy*, to its current position, adjacent to  
477 the pseudoautosomal region.

478

#### 479 **Y chromosome centromere evolution**

480 Due to their highly repetitive nature, centromeric arrays have been challenging to  
481 sequence and assemble using traditional approaches. However, long-read technologies have  
482 shown recent promise in traversing these inaccessible regions (Jain et al. 2018; Mahajan et al.  
483 2018; Bracewell et al. 2019). Using long-read sequencing, we were also able to recover two  
484 contigs in our assembly that contained arrays of an alpha satellite monomeric repeat that had  
485 sequence similarity to a monomeric repeat isolated from the remainder of the genome (Cech and  
486 Peichel 2015). Centromeres across species are highly variable both at the level of the individual  
487 monomer and how monomers are organized at a higher level (Henikoff et al. 2001; Malik and  
488 Henikoff 2002; Alkan et al. 2011; Melters et al. 2013; McNulty and Sullivan 2018; Hartley and  
489 O'Neill 2019). This incredible variability can even occur within species. For example, in humans

490 centromeric HORs are not identical between nonhomologous chromosomes (Manuelidis 1978;  
491 Willard 1985), and the Y chromosomes of mouse and humans contain divergent or novel  
492 centromeric repeats relative to the autosomes (Wolfe et al. 1985; Pertile et al. 2009; Miga et al.  
493 2014). Consistent with these patterns, we observed a decrease in sequence similarity between  
494 the Y chromosome monomeric repeat and the consensus repeat identified from the remainder of  
495 the threespine stickleback genome (Cech and Peichel 2015). We found the Y chromosome was  
496 also ordered into a complex HOR; however, we cannot determine if the structure of the Y  
497 chromosome HOR is similar or dissimilar from other threespine stickleback chromosomes. The  
498 centromere sequence from other chromosomes is currently limited to short tracts of monomeric  
499 repeats (Cech and Peichel 2015).

500         Cytogenetic work has shown the threespine stickleback Y chromosome centromere may  
501 contain a divergent satellite repeat relative to the X chromosome and autosomes (Cech and  
502 Peichel 2015; 2016). This hypothesis was based on a weak fluorescent *in situ* hybridization signal  
503 on the Y chromosome from DNA probes designed from the consensus repeat. Our Y chromosome  
504 assembly indicates a mechanism driving this pattern may be the reduced sequence identity  
505 shared between the Y chromosome monomeric repeat and the consensus monomeric repeat. An  
506 alternative explanation is that the weak hybridization signal is not due to the differences in  
507 monomeric repeat sequence, but it is actually caused by a reduction in overall size of the Y  
508 chromosome centromere. Although we isolated ~87 kb of centromere sequence, we did not  
509 identify a contig that spans the complete centromere, leaving the actual size of the centromere  
510 unknown. Additional sequencing work is necessary to test this alternative model.

511

## 512 **The genetic architecture of the threespine stickleback Y chromosome is rapidly evolving**

513         Despite the young age of the threespine stickleback Y chromosome relative to mammals,  
514 we found acquisition of novel genes throughout all strata of the Y chromosome. We did not detect  
515 massive amplification of gene families as observed on mammalian sex chromosomes (Skaletsky



516 et al. 2003; Murphy et al. 2006; Hughes et al. 2010; Paria et al. 2011; Soh et al. 2014; Janečka  
517 et al. 2018), but many genes that had translocated from the autosomes or were present in the  
518 common ancestor of the sex chromosomes had multiple copies on the Y chromosome. The copy  
519 numbers we observed are on the same order as the duplicated genes on the sex chromosomes  
520 of multiple species of *Drosophila* (Chang and Larracuenta 2018; Ellison and Bachtrog 2019). The  
521 gene duplications on the threespine stickleback sex chromosomes may reflect selection on the  
522 early amplification of genes important for male fertility (Gvozdev et al. 2005) or to prevent  
523 degradation by providing a repair template through gene conversion (Rozen et al. 2003; Skaletsky  
524 et al. 2003; Backström et al. 2005; Bhowmick et al. 2007; Connallon and Clark 2010; Davis et al.  
525 2010; Marais et al. 2010; Hallast et al. 2013; Soh et al. 2014; Skinner et al. 2016; Peneder et al.  
526 2017; Trombetta and Cruciani 2017; Chang and Larracuenta 2018). Alternatively, the duplications  
527 we observe on the threespine stickleback Y chromosome may simply reflect recent translocations  
528 and duplications that have yet to degenerate and pseudogenize.

529       Gene expression patterns of duplicated and translocated genes suggest this process is  
530 not entirely neutral. We observed strong testis-biased expression among genes that had  
531 duplicated and translocated to the Y chromosome, similar to patterns observed on other Y  
532 chromosomes (Carvalho et al. 2000; 2001; Skaletsky et al. 2003; Murphy et al. 2006; Hughes et  
533 al. 2010; Paria et al. 2011; Soh et al. 2014; Mahajan and Bachtrog 2017; Janečka et al. 2018).  
534 Interestingly, we observed multiple ways that testis-biased genes can accumulate on the Y  
535 chromosome. For one, many genes exhibit ancestral testis-biased expression. Genes that have  
536 translocated from the autosomes to the Y chromosome had a similar degree of testis-biased  
537 expression as the ancestral autosomal gene. The X-linked homologs of genes that are duplicating  
538 on the Y chromosome also had testis-biased expression ancestrally. This suggests genes can be  
539 selected to be retained on the Y chromosome because of existing male-biased expression  
540 patterns. Our observations mirror translocations on the ancient human Y chromosome; the  
541 amplified *DAZ* genes arose from an autosomal paralog that was expressed in the testis (Saxena

542 et al. 1996). Examples of autosome-derived translocations to the Y chromosome also exist in  
543 *Drosophila* and can have ancestral testis-biased functions (Carvalho et al. 2001). On the other  
544 hand, we also found that autosome-derived translocated genes evolved stronger testis-biased  
545 expression in a tissue specific-context compared to ancestral expression. The variation in testis-  
546 biased expression observed among tissue comparisons suggests the acquisition of testis  
547 functions for many genes is incomplete. This makes the threespine stickleback Y chromosome a  
548 useful system to understand the regulatory changes required for genes to evolve novel functions  
549 in the testis.

550 Genes that translocate to the Y chromosome either arise through RNA-mediated  
551 mechanisms or through DNA-based translocations (reviewed in Long et al. 2013). Of the  
552 translocations we observed, we only detected DNA-based translocations. Work in other species  
553 has shown that DNA-based duplications occur more frequently than RNA-mediated mechanisms  
554 (Zhang et al. 2010a; 2010b; Long et al. 2013; Chang and Larracunte 2018). Our results support  
555 this bias on young sex chromosomes. It is possible that the frequency of DNA-based duplications  
556 is even higher on young sex chromosomes compared to ancient sex chromosomes. DNA-based  
557 duplications are driven by erroneous double strand break repair. On the ancient sex  
558 chromosomes of rodents, double strand break initiation is suppressed on the sex chromosomes  
559 of males (Moens et al. 1997; Lange et al. 2016). This would limit the opportunity for DNA-based  
560 translocations to occur due to aberrant double strand break repair during meiosis. However, on  
561 young sex chromosomes double strand break frequencies may still be occurring at an appreciable  
562 frequency. Coupling a diverging Y chromosome with accumulating repetitive DNA would create  
563 additional opportunities for double strand break repair through non-allelic processes, increasing  
564 the number of duplications and translocations (Sasaki et al. 2010).

565

566 ***Amhy* is a candidate sex determination gene**

567 We identified the *Amhy* gene as a candidate for male sex determination in the threespine  
568 stickleback. *Amh* has been co-opted as a male sex determination gene in multiple species of fish  
569 (Hattori et al. 2012; Li et al. 2015; Pan et al. 2019). The master sex determination gene is one of  
570 the primary genes that initiates evolution of a proto-Y chromosome (reviewed in Bachtrog 2013).  
571 Consistent with this, *Amhy* is located in the oldest region of the stickleback Y chromosome  
572 (stratum one), adjacent to the pseudoautosomal region. The gene is expressed in developing  
573 stickleback larvae, consistent with a role in early sex determination. Finally, amino acids that are  
574 highly conserved across vertebrates in the functional domains of the protein are also conserved  
575 on the Y chromosome paralog in stickleback fish, suggesting *Amhy* is functional. Based on the  
576 known role of AMH signaling in sex determination in other fish, and the location, expression, and  
577 sequence of the Y chromosome paralog in stickleback fish, we propose that *Amhy* is the  
578 threespine stickleback master sex determination gene. Additional functional genetics work is  
579 underway to test this hypothesis.

580

## 581 **Conclusions**

582 Our threespine stickleback Y chromosome assembly highlights the feasibility of combining  
583 PacBio long-read sequencing with Hi-C chromatin conformation scaffolding to generate a high-  
584 quality reference Y chromosome assembly. With the reduction in per base pair cost associated  
585 with the newest generation of sequencers, the comparative genomics of sex chromosomes will  
586 be more accessible. This will be especially useful for taxa like stickleback fish that have multiple  
587 independently derived sex chromosome systems among closely related species (Ross et al.  
588 2009). This provides a unique opportunity to understand the convergent evolution of sex  
589 chromosome structure as well as the diversity of sex determination mechanisms.

590

## 591 **Materials and Methods**

## 592 **Ethics statement**

593 All procedures using animals were approved by the Fred Hutchinson Cancer Research  
594 Center Institutional Animal Care and Use Committee (protocol 1575), the Veterinary Service of  
595 the Department of Agriculture and Nature of the Canton of Bern (protocol BE17/17), and the  
596 University of Georgia Animal Care and Use Committee (protocol A2018 10-003-R1).

597

### 598 **DNA isolation and PacBio Sequencing**

599 Total DNA was isolated from a single adult male threespine stickleback that was the  
600 laboratory-reared offspring of wild-caught fish collected from the Paxton Lake benthic population  
601 (Texada Island, British Columbia). Nucleated erythrocytes were isolated from blood (extracted by  
602 repeated pipetting in bisected tissue with 0.85x SSC buffer). High molecular weight DNA was  
603 isolated by centrifuging blood for 2 minutes at 2000 xg, followed by resuspension of cells in 5 ml  
604 of 0.85x SSC and 27  $\mu$ l of 20  $\mu$ g/ml proteinase K. Cells were lysed by adding 5 mL of 2x SDS  
605 buffer (80 mM EDTA, 100mM Tris pH 8.0, 1% SDS), followed by incubation at 55°C for 2 minutes.  
606 DNA was isolated from the lysate by adding 10 mL of buffered phenol/chloroform/isoamyl-alcohol,  
607 rotating slowly at room temperature for 30 minutes, followed by centrifuging at 4°C for 1 minute  
608 at 2000 xg. Two further extractions were performed by adding 10 mL of chloroform, rotating slowly  
609 at room temperature for 1 hour, followed by centrifuging at 4°C for 1 minute at 2000 xg. DNA was  
610 precipitated using 1 mL of 3M sodium-acetate (pH 6.0) and 10 mL of cold 100% ethanol. The  
611 pellet was washed with cold 70% ethanol and resuspended in 100  $\mu$ l of 10 mM Tris (pH 8.0). DNA  
612 quality was assessed on a FEMTO Pulse (Agilent, Santa Clara, CA, USA); the peak size was  
613 132,945 bp. Size selection, library preparation and sequencing on a PacBio Sequel platform was  
614 conducted at the Next Generation Sequencing Platform at the University of Bern (Bern,  
615 Switzerland). 37.69 Gb was sequenced across seven SMRT cells, resulting in approximately  
616 75.25x coverage across the genome.

617

### 618 **PacBio assembly**

619 Canu (v 1.7.1) (Koren et al. 2017) was used to error correct, trim, and assemble the raw  
620 PacBio reads into contigs. Default parameters were used except corOutCoverage was increased  
621 to 50 (from the default of 40) to target a larger number of reads for assembly of the sex  
622 chromosomes (the X and Y chromosomes in males have only half the available read coverage,  
623 relative to the autosomes). Increasing corOutCoverage did not decrease the N50 read size for  
624 the assembly (default 40x coverage N50: 31,494 bp; 50x coverage N50: 22,133 bp). The Canu  
625 assembly was polished using Arrow (v. 2.2.2). Raw PacBio reads were first aligned to the  
626 assembled Canu contigs using pbaln (v. 0.3.1) with default parameters. Arrow was run on the  
627 subsequent alignment also using default parameters. We identified redundancy between  
628 haplotigs of the autosomal contigs by aligning all the contigs to each other using nucmer (Kurtz  
629 et al. 2004) and filtering for alignments between contigs that were at least 1 kb in length and had  
630 at least 98% sequence identity (to account for the elevated heterozygosity).

631

### 632 **Hi-C proximity guided assembly**

633 The X and Y chromosomes of threespine stickleback share a considerable amount of  
634 sequence homology (White et al. 2015). In order to differentiate X-linked and Y-linked Canu  
635 contigs for scaffolding, we aligned the contigs to the revised reference X chromosome sequence  
636 (Peichel et al. 2017), using nucmer in the MUMmer package (v. 4.0) (Kurtz et al. 2004). Putative  
637 X- and Y-linked contigs were separated by overall sequence identity. Putative X-linked contigs  
638 were defined as having more than 25% of the contig length aligned to the reference X  
639 chromosome with a sequence identity greater than 96%, whereas putative Y-linked contigs were  
640 defined as having a sequence identity with the reference X chromosome of less than 96%. Contigs  
641 which had less than 25% of the length aligning to the reference genome or did not align at all  
642 were retained as putative Y-linked unique sequence. Selection of the sequence identity threshold  
643 was guided by our overall ability to re-assemble the known X chromosome sequence from the set  
644 of putative X-linked PacBio Canu contigs. We tested thresholds from 92% sequence identity to

645 98% sequence identity and chose the threshold that resulted in the smallest size difference  
646 between the PacBio assembly and the X chromosome sequence from the reference assembly  
647 (Peichel et al. 2017) (Supplemental Table 3). We wrote custom Perl scripts to separate the X-  
648 and Y-linked contigs.

649 To scaffold the contigs, we used chromosome conformation capture (Hi-C) sequencing  
650 and proximity-guided assembly. Hi-C sequencing was previously conducted from a lab-reared  
651 adult male also from the Paxton Lake benthic population (Texada Island, British Columbia) (NCBI  
652 SRA database: SRP081031) (Peichel et al. 2017). Hi-C reads were aligned to the complete set  
653 of contigs from the Canu assembly using Juicer (v. 1.5.6) (Durand et al. 2016a; Dudchenko et al.  
654 2017). 3D-DNA (v. 180114) was used to scaffold the putative X- and Y-linked contigs separately  
655 (Durand et al. 2016a; Dudchenko et al. 2017). Default parameters were used except for --editor-  
656 repeat-coverage, which controls the threshold for repeat coverage during the misjoin detector  
657 step. Because Y chromosomes often have more repetitive sequence than the remainder of the  
658 genome, we scaffolded the X- and Y-linked contigs using --editor-repeat-coverage thresholds that  
659 ranged from 8 to 18. We chose the minimum threshold that resulted in a Y chromosome scaffold  
660 that maximized the total number of Y chromosome Sanger sequenced BACs that either aligned  
661 concordantly within contigs included in the scaffold or correctly spanned gaps between contigs in  
662 the scaffold (--editor-repeat-coverage 11; Supplemental Table 4) (see Alignment of BAC  
663 sequences and merging assemblies).

664

### 665 **BAC isolation and Sanger sequencing**

666 Y-chromosome specific BACs were isolated from the CHORI-215 library (Kingsley et al.  
667 2004), which was made from two wild-caught males from the same Paxton Lake benthic  
668 population (Texada Island, British Columbia, Canada) used for the PacBio and Hi-C sequencing.  
669 The Y-chromosome specific BACs were identified using a variety of approaches. Initially,  
670 sequences surrounding known polymorphic markers (*Idh*, *Stn188*, *Stn194*) on linkage group 19

671 were used as probes to screen the CHORI-215 BAC library filters, and putative Y-specific BACs  
672 were identified by the presence of a Y-specific allele at that marker (Peichel et al. 2004; Ross and  
673 Peichel 2008). In addition, all CHORI-215 BAC end sequences (Kingsley and Peichel 2006) were  
674 used in a BLAST (blastn) search of the threespine stickleback genome assembly, which was  
675 generated from an XX female (Jones et al. 2012). All BACs for which neither end mapped to the  
676 genome or had elevated sequence divergence from the X chromosome were considered as  
677 candidate Y-chromosome BACs. These candidate BACs were verified to be Y-specific using  
678 fluorescent *in situ* hybridization (FISH) on male metaphase spreads, following previously  
679 described protocols (Ross and Peichel 2008; Urton et al. 2011). The hybridizations were  
680 performed with CHORI-213 BAC 101E08 (*ldh*), which clearly distinguishes the X and Y  
681 chromosomes (Ross and Peichel 2008) labeled with ChromaTide Alexa Fluor 488-5-dUTP, and  
682 the putative Y-specific BAC labeled with ChromaTide Alexa Fluor 568-5-dUTP (Invitrogen,  
683 Carlsbad, CA, USA). Starting with these verified Y-specific BACs, we then used the CHORI-215  
684 BAC end sequences to iteratively perform an *in silico* chromosome walk. At each stage of the  
685 walk, BACs were verified as Y-specific using FISH. In total 102 BACs were sequenced.

686 BAC DNA was isolated from a single bacterial colony and purified on a Qiagen MaxiPrep  
687 column. DNA was sheared to 3-4kb using Adaptive Focused Acoustics technology (Covaris,  
688 Woburn, MA, USA) and cloned into the plasmid vector pIK96 as previously described (Ferris et  
689 al. 2010). Universal primers and BigDye Terminator Chemistry (Applied Biosystems) were used  
690 for Sanger sequencing randomly selected plasmid subclones to a depth of 10x. The  
691 Phred/Phrap/Consed suite of programs were then used for assembling and editing the sequence  
692 (Ewing et al. 1998; Ewing and Green 1998; Gordon et al. 1998). After manual inspection of the  
693 assembled sequences, finishing was performed both by resequencing plasmid subclones and by  
694 walking on plasmid subclones or the BAC clone using custom primers. All finishing reactions  
695 were performed using dGTP BigDye Terminator Chemistry (Applied Biosystems, USA). Finished  
696 clones contain no gaps and are estimated to contain less than one error per 10,000 bp.

697

## 698 **Alignment of BAC sequences and merging assemblies**

699         Sequenced BAC inserts were aligned to the scaffolded Y chromosome using nucmer (v.  
700 4.0) (Kurtz et al. 2004). A BAC was considered fully concordant with the PacBio Y chromosome  
701 scaffold if the following conditions were met: both ends of the alignment were within 1 kb of the  
702 actual end of the Sanger sequenced BAC, the full length of the alignment was within 10 kb of the  
703 actual length of the Sanger sequenced BAC, and the total alignment shared a sequence identity  
704 with the PacBio Y chromosome scaffold of at least 99%. BAC alignments were also identified that  
705 spanned gaps between contigs in the scaffold. An alignment that spanned gaps was considered  
706 valid if the following conditions were met: both ends of the alignment were within 1 kb of the actual  
707 end of the Sanger sequenced BAC, the total alignment length was not greater than the actual  
708 length of the Sanger sequenced BAC, and the total alignment shared a sequence identity with  
709 the PacBio Y chromosome scaffold of at least 99%. Finally, BACs were identified that extended  
710 from contigs into gaps within the scaffold but did not completely bridge the gaps. BACs that  
711 extended into gaps were identified if one end of the alignment was within 1 kb of the actual end  
712 of the Sanger sequenced BAC, the alignment extended completely to the end of a contig in the  
713 scaffold, and the total alignment shared a sequence identity with the PacBio Y chromosome  
714 scaffold of at least 99%. We wrote custom Perl scripts to identify concordant BACs, BACs that  
715 spanned gaps in the scaffold, and BACs that extended into gaps within the scaffold.

716         Sanger sequenced BACs that spanned gaps and extended into gaps provided additional  
717 sequence that was not originally present in the PacBio scaffolded Y chromosome. We merged  
718 this additional sequence into the PacBio scaffold using custom Perl scripts. If multiple Sanger  
719 sequenced BACs spanned a gap or extended into a gap, the BAC with the highest percent  
720 sequence identity was used.

721

## 722 **Repetitive element annotation**



723 Repetitive elements were first modeled together on the PacBio scaffolded X and Y  
724 chromosomes using RepeatModeler (v. 1.0.11) (Smit et al. 2013) with default parameters.  
725 Repeats were masked across both scaffolds using RepeatMasker (v. 4.0.7) (Smit et al. 2013) with  
726 default parameters and the custom database created by RepeatModeler. Sequence identity  
727 among family members within each class of transposable elements was estimated with BLAST.  
728 Repeat families were first summarized from the RepeatMasker output using the Perl tool, “one  
729 code to find them all” (Bailly-Bechet et al. 2014). Pairwise alignments were then conducted within  
730 each chromosome across the genome. For each chromosome, pairwise blastn alignments were  
731 conducted for each repeat family. If multiple alignments were found between family members only  
732 the alignment with the highest score was retained (the score was calculated as alignment length  
733 – number of mismatches – number of gap openings). Percent identity as reported by blastn was  
734 used for each retained alignment.

735

### 736 **Identification of the Y centromere**

737 The Y chromosome centromere was localized using chromatin immunoprecipitation  
738 targeting centromere protein A (CENP-A) as previously described (Cech and Peichel 2015).  
739 Immunoprecipitated and input DNA from two males from the Japanese Pacific Ocean population  
740 (Akkeshi, Japan) were 150-bp paired-end sequenced using an Illumina HiSeq 2500. Reads were  
741 quality trimmed with Trimmomatic (v. 0.36) (Bolger et al. 2014) using a sliding window of 4 bases,  
742 trimming the remainder of the read when the average quality within a window dropped below 15.  
743 Trimmed paired-end reads were aligned to the scaffolded Y chromosome assembly with Bowtie2  
744 (v. 2.3.4.1) (Langmead and Salzberg 2012), using default parameters. This resulted in an overall  
745 alignment rate of 83.9% (chromatin only input) and 81.0% (immunoprecipitation) for the first male  
746 and 82.3% (chromatin only input) and 79.8% (immunoprecipitation) for the second male. We  
747 quantified the read depth of aligned reads at every position across the Y chromosome using the  
748 genomecov package of BEDTools (v. 2.28.0) (Quinlan and Hall 2010). We calculated fold-

749 enrichment of reads in the immunoprecipitation versus the input DNA at every position across the  
750 Y chromosome. Each position was normalized by the total number of reads in the respective  
751 sample before calculating the immunoprecipitation to input DNA ratio. The mean fold-enrichment  
752 was calculated every 1 kb across the Y chromosome. Fold-enrichment was quantified using a  
753 custom Perl script.

754 The autosomal core centromere repeat (GenBank accession KT321856) (Cech and  
755 Peichel 2015) was aligned to the Y centromere region using BLAST (blastn) (Altschul et al. 1990).  
756 Only hits that had an alignment length  $\pm 10$  bp of the core 187 bp repeat were retained. Average  
757 percent identity was calculated among the remaining BLAST hits. We determined a majority  
758 consensus sequence from the core 14 centromere repeat units from the initial Y chromosome  
759 assembly. The majority consensus was used to identify additional repeats in the “debris”  
760 fragments that flanked the gap in the scaffold where the Y centromere was originally identified.  
761 The majority consensus was aligned to the debris fragments using BLAST (blastn), retaining  
762 alignments that had an alignment length  $\pm 10$  bp of the core 187 bp repeat. Pairwise alignments  
763 between all repeats within the Y chromosome was conducted using BLAST (blastn). Average  
764 percent identity among all pairwise alignments was calculated using a custom Perl script.

765

## 766 **Molecular evolution of genes on the Y chromosome**

767 To characterize divergence between ancestral genes shared by the X and Y  
768 chromosomes, we aligned the coding sequence of each ENSEMBL predicted gene to the Y  
769 chromosome using Exonerate (v. 2.4.0) (Slater and Birney 2005) using the parameters --model  
770 est2genome --bestn 15. Only coding sequences for which at least 95% of its sequence length  
771 aligned to the Y chromosome were retained for further analysis.  $d_S$  and  $d_N$  were quantified for  
772 each pairwise alignment using the codeml module of PAML (phylogenetic analysis by maximum  
773 likelihood) (runmode = 2) (Yang 2007). If an X coding sequence aligned to multiple locations on  
774 the Y chromosome, only the alignment with the lowest  $d_S$  was retained. In addition, all alignments

775 with  $d_s$  greater than two were removed. These stringent filtering steps aimed to limit alignments  
776 to the true homolog, rather than to distantly related paralogs of genes that are present in greater  
777 than one copy on the sex chromosomes. For estimating  $d_N/d_S$ , transcripts with a value of 99 were  
778 omitted. Strata breakpoints were broadly based upon the inversion breakpoints in the cytogenetic  
779 map (Ross and Peichel 2008), adjusted at a fine-scale by the inversion breakpoints in the  
780 alignments between the assembled Y chromosome and the reference X chromosome  
781 (breakpoints on the Y chromosome: PAR/stratum one: 0.34 Mb; stratum one/stratum two: 4.67  
782 Mb; stratum two/stratum three: 9.67 Mb).

783 To characterize whether there were any novel genes acquired by the Y chromosome as  
784 well as any duplicated genes, we aligned each MAKER annotated gene on the PacBio assembled  
785 Y chromosome to the whole genome as well as back to the Y chromosome, following the same  
786 exonerate procedure. If a homolog was identified on an autosome, we only retained the homolog  
787 if  $d_s$  was lower than the median  $d_s$  across the oldest region of the Y chromosome (stratum one:  
788 0.101). Using this stringent filter avoids incorrectly assigning ancient paralogs on the autosomes  
789 as the homolog. If multiple alignments were identified on the X chromosome, only the alignment  
790 with the lowest  $d_s$  was retained. If multiple overlapping paralogs from a single gene were identified  
791 on the Y chromosome, only the paralog with the lowest  $d_s$  was retained. Alignments to the  
792 unassigned contigs (ChrUn) were ignored because these contigs cannot be unambiguously  
793 assigned to the X chromosome or to the autosomes.

794

### 795 **Gene annotation across the PacBio assembled Y chromosome**

796 Genes were annotated on the repeat masked Y chromosome scaffold using the MAKER  
797 genome annotation pipeline (v. 3.01.02) (Cantarel et al. 2008; Holt and Yandell 2011) using  
798 evidence from multiple RNA-seq transcriptomes, all predicted protein sequences from ENSEMBL  
799 (release 95), and *ab initio* gene predictions from SNAP (Korf 2004) and Augustus (Stanke et al.  
800 2006). RNA-seq from was conducted on multiple tissue samples. RNA from adult male whole

801 brains was previously extracted and sequenced from wild-caught fish from the Japanese Pacific  
802 Ocean population, Akkeshi, Japan (NCBI BioProject accession: PRJNA277770) (White et al.  
803 2015). Male larval tissue was collected from stages 22-26 (Swarup 1958) when sex determination  
804 is believed to occur (Lewis et al. 2008). Larvae were collected from laboratory-reared progeny of  
805 wild-caught fish from the Lake Washington population (Seattle, Washington). Larvae were pooled  
806 into two samples, one consisting of five males and the other consisting of six males. Total RNA  
807 was extracted using TRIzol reagent (Invitrogen, USA) following standard protocols. Library  
808 preparation and sequencing was conducted by the Fred Hutchinson Cancer Research Center  
809 Genomics Shared Resource. Single-end sequencing was carried out on a Genome Analyzer II  
810 for 72 cycles. Liver and testis tissues were also collected from adult and juvenile fish from  
811 laboratory-reared progeny of wild-caught fish from the Japanese Pacific Ocean population  
812 (Akkeshi, Japan). Livers and testes were collected from two males and pooled. Three juvenile  
813 samples and three adult samples were collected. Total RNA was extracted using TRIzol reagent  
814 (Invitrogen, USA) following standard protocols. Library preparation and sequencing was  
815 conducted by the Georgia Genomics and Bioinformatics Core at the University of Georgia. Paired-  
816 end sequencing was carried out on a NextSeq 500 for 150 cycles. All reads were quality trimmed  
817 with Trimmomatic (v. 0.36) (Bolger et al. 2014) using a sliding window of 4 bases, trimming the  
818 remainder of the read when the average quality within a window dropped below 15.

819 We aligned sequences to the masked revised whole-genome reference assembly (Peichel  
820 et al. 2017) using Tophat (v. 2.3.4.1) (Kim et al. 2013). Default parameters were used except for  
821 the liver and testis tissues. For these tissues, we used --read-mismatches 4 and --read-edit-dist  
822 4 to account for the greater number of SNPs in the 150 bp reads. These alignment parameters  
823 produced an overall alignment rate to the masked genome of 80.4% for the brain tissue, 68.0%  
824 in the adult liver tissue, 64.5% in the juvenile liver tissue, 64.7% for adult testis tissue, 65.5% for  
825 the juvenile testis tissue, and 68.9% for the larval tissue. Aligned reads from all samples within a  
826 tissue were pooled to construct a single tissue-specific set of transcripts using Cufflinks (v. 2.2.1)

827 (Roberts et al. 2011) with default parameters. Exons from the GTF file were converted to FASTA  
828 sequences with gffread.

829 MAKER was run over three rounds. For the first round of MAKER, we only used evidence  
830 from the RNA-seq transcripts and all annotated protein sequences from ENSEMBL (release 95)  
831 using default parameters and `est2genome=1`, `protein2genome=1` to infer gene predictions directly  
832 from the transcripts and protein sequences. We used these gene models to train SNAP. In  
833 addition, Augustus was trained using gene models from BUSCO conserved orthologs found on  
834 the PacBio scaffolded Y chromosome and the revised reference assembly (Glazer et al. 2015;  
835 Peichel et al. 2017) with the Actinopterygii dataset and default BUSCO (v. 3.0.2) parameters  
836 (Simão et al. 2015; Waterhouse et al. 2017). MAKER was run using the new SNAP and Augustus  
837 models with `est2genome=0` and `protein2genome=0`. For the third round of MAKER, SNAP was  
838 retrained with the updated gene models and MAKER was run again with the updated SNAP  
839 model, the previous Augustus model, and `est2genome=0` and `protein2genome=0`. The threespine  
840 stickleback repeat library derived using RepeatModeler was used during the annotation pipeline  
841 using the `rmlib` option.

842

### 843 **Identification of haploinsufficient genes**

844 One-to-one human-threespine stickleback fish orthologs were identified from the  
845 ENSEMBL species comparison database. Orthologs were restricted to those with a human  
846 orthology confidence of 1. The high confidence orthologs were matched to the human  
847 haploinsufficiency predictions from the DECIPHER database (v. 3) (Firth et al. 2009; Huang et al.  
848 2010).

849

### 850 **Differential expression of genes on the Y chromosome**

851 For each tissue used in the gene annotations, the total number of RNA reads that mapped  
852 to the reference Y chromosome was counted using `htseq-count` (HTSeq software package; v.

853 0.9.1) (Anders et al. 2015). Read counts were obtained across all 626 MAKER identified genes  
854 across the male-specific region of the Y chromosome plus all additional paralogs (132 paralogs).  
855 Default parameters were used with the addition of --stranded=no and --nonunique all. Ambiguous  
856 reads were included in the counts because of the large number of paralogs on the Y chromosome  
857 with high sequence identity. In the case a read could not be unambiguously mapped it was  
858 assigned to all features to which it matched. Genes were removed from the analysis if they had a  
859 read count of zero in all samples. Scaling factors for normalization were calculated using the  
860 trimmed mean of M-values (TMM) method in the Bioconductor package, edgeR (Robinson et al.  
861 2010). The TMM method minimizes the log-fold changes between samples for most genes. This  
862 approach may not be appropriate for a Y chromosome, which is expected to be enriched for male-  
863 biased gene expression. Therefore, we calculated scaling factors for all autosomal transcripts and  
864 normalized the Y chromosome transcripts using these scaling factors. ENSEMBL annotated  
865 transcripts were used for the autosomes. Replicates were grouped based on tissue (testis: six  
866 samples; liver: six samples; brain: three samples; larvae: two samples). Log<sub>2</sub> fold-change was  
867 calculated for each gene in each tissue comparison using edgeR.

868

### 869 **Characterization of *Amhy***

870 The protein sequence of AMHY was aligned to AMH sequences from human (GenBank  
871 AAH49194.1), mouse (GenBank NP\_031471.2), chicken (GenBank NP\_990361.1), zebrafish  
872 (GenBank AAX81416.1), and the paralog of AMH on threespine stickleback chromosome eight  
873 (ENSGACP00000016697) using CLUSTALW with default parameters in Geneious Prime (v.  
874 2019.1.1) (<https://www.geneious.com>). Gene expression level was quantified for *Amhy* in the six  
875 different tissues used for gene annotation. Read counts per million (CPM) for each tissue was  
876 calculated from the TMM-scaled samples from the differential expression analysis.

877

### 878 **Data Access**

879 All raw sequencing data and the Y chromosome reference sequence generated in this  
880 study have been submitted to the NCBI BioProject database  
881 (<https://www.ncbi.nlm.nih.gov/bioproject/>) under accession number PRJNA591630.

882

### 883 **Acknowledgements**

884 The authors acknowledge the following funding sources: NIH R01 GM071854 (CLP), NIH  
885 P50 HG002568 (RMM, DMK, CLP), NIH R01 GM116853 (CLP), Fred Hutchinson Cancer  
886 Research Center (CLP), Swiss National Science Foundation 31003A\_176130 (CLP),  
887 Evolutionary, Ecological, or Conservation Genomics Research Award from the American Genetic  
888 Association (MAW), Howard Hughes Medical Institute and the Life Sciences Research  
889 Foundation (MAW), NIH Cell and Molecular Biology Training Grant T32 GM07270 (JAR), NIH  
890 Genome Training Grant T32 HG00035 (JRU), NIH Chromosome Metabolism and Cancer Training  
891 Grant T32 CA009657 (JNC), National Science Foundation Graduate Research Fellowship DGE  
892 1256082 (JNC), Office of the Vice President of Research at the University of Georgia (MAW), and  
893 National Science Foundation IOS 1645170 (MAW). The authors also acknowledge Ivan Liachko  
894 and Shawn Sullivan (Phase Genomics) for assistance with Hi-C scaffolding, and the following  
895 core facilities for sequencing: Fred Hutchinson Cancer Research Center Genomics Shared  
896 Resource, Next Generation Sequencing Platform of the University of Bern, The Georgia  
897 Genomics and Bioinformatics Core at the University of Georgia. Arne Nolte, Joana Meier, and  
898 Marcel Häsler provided advice on the isolation of high molecular weight DNA. Amanda Bruner  
899 provided guidance in staging the threespine stickleback embryos.

900

### 901 **Disclosure Declaration**

902 The authors have no conflicts of interest to disclose.

## References

- Alexandrov IA, Medvedev LI, Mashkova TD, Kisselev LL, Romanova LY, Yurov YB. 1993. Definition of a new alpha satellite suprachromosomal family characterized by monomeric organization. *Nucleic Acids Res* **21**: 2209–2215.
- Alkan CC, Cardone MM, Catacchio CC, Antonacci FF, O'Brien SJ, Ryder OA, Purgato SS, Zoli MM, Valle GG, Eichler EE, et al. 2011. Genome-wide characterization of centromeric satellites from multiple mammalian genomes. *Genome Res* **21**: 137-145.
- Altschul SF, Gish W, Miller W, Myers EW, Lipman DJ. 1990. Basic local alignment search tool. *J Mol Biol* **215**: 403–410.
- Anders S, Pyl P, Huber W. 2015. HTSeq—a Python framework to work with high-throughput sequencing data. *Bioinformatics* **31**: 166–169.
- Bachtrog D. 2013. Y-chromosome evolution: emerging insights into processes of Y-chromosome degeneration. *Nature Reviews Genetics* **14**: 113-124.
- Bachtrog D, Mank JE, Peichel CL, Kirkpatrick M, Otto SP, Ashman T-L, Hahn MW, Kitano J, Mayrose I, Ming R, et al. 2014. Sex determination: why so many ways of doing it? *PLoS Biology* **12**: e1001899.
- Backström N, Cepelitis H, Berlin S, Ellegren H. 2005. Gene conversion drives the evolution of HINTW, an ampliconic gene on the female-specific avian W chromosome. *Mol Biol Evol* **22**: 1992-1999.
- Bailly-Bechet M, Haudry A, Lerat E. 2014. “One code to find them all”: a Perl tool to conveniently parse RepeatMasker output files. *Mobile DNA* **5**: 13.
- Bell M, Stewart J, Park P. 2009. The world’s oldest fossil threespine stickleback fish. *Copeia* **2**: 256-265.
- Bellott DW, Bellott DW, Hughes JF, Hughes JF, Skaletsky H, Skaletsky H, Brown LG, Brown LG, Pyntikova T, Pyntikova T, et al. 2014. Mammalian Y chromosomes retain widely expressed dosage-sensitive regulators. *Nature* **508**: 494-499.
- Bellott DW, Skaletsky H, Cho T-J, Brown L, Locke D, Chen N, Galkina S, Pyntikova T, Koutseva N, Graves T, et al. 2017. Avian W and mammalian Y chromosomes convergently retained dosage-sensitive regulators. *Nature Genetics* **49**: 387-394.
- Bhowmick B, Satta Y, Takahata N. 2007. The origin and evolution of human ampliconic gene families and ampliconic structure. *Genome Res* **17**: 441-450.
- Blackmon H, Demuth JP. 2014. Estimating Tempo and Mode of Y Chromosome Turnover: Explaining Y Chromosome Loss With the Fragile Y Hypothesis. *Genetics* **197**: 561-572.
- Bolger AM, Lohse M, Usadel B. 2014. Trimmomatic: a flexible trimmer for Illumina sequence data. *Bioinformatics* **30**: 2114–2120.



Bracewell R, Chatla K, Nalley MJ, Bachtrog D. 2019. Dynamic turnover of centromeres drives karyotype evolution in *Drosophila*. *Elife* **8**: e49002.

Brashear WA, Raudsepp T, Murphy WJ. 2018. Evolutionary conservation of Y Chromosome ampliconic gene families despite extensive structural variation. *Genome Res* **28**: 1841-1851.

Cantarel B, Cantarel BL, Korf I, Korf I, Robb S, Robb SM, Parra G, Parra G, Ross E, Ross E, et al. 2008. MAKER: an easy-to-use annotation pipeline designed for emerging model organism genomes. *Genome Res* **18**: 188-196.

Capel B. 2017. Vertebrate sex determination: evolutionary plasticity of a fundamental switch. *Nature Reviews Genetics* **18**: 675-689.

Carvalho A, Dobo BA, Vibranovski MD, Clark AG. 2001. Identification of five new genes on the Y chromosome of *Drosophila melanogaster*. *Proc National Acad Sci* **98**: 13225–13230.

Carvalho A, Lazzaro BP, Clark AG. 2000. Y chromosomal fertility factors kl-2 and kl-3 of *Drosophila melanogaster* encode dynein heavy chain polypeptides. *Proc National Acad Sci* **97**: 13239–13244.

Cech JN, Peichel CL. 2016. Centromere inactivation on a neo-Y fusion chromosome in threespine stickleback fish. *Chromosome Res* **24**: 437–450.

Cech JN, Peichel CL. 2015. Identification of the centromeric repeat in the threespine stickleback fish (*Gasterosteus aculeatus*). *Chromosome Research* **23**: 767-779.

Chang C-H, Larracuenta AM. 2018. Heterochromatin-enriched assemblies reveal the Sequence and organization of the *Drosophila melanogaster* Y chromosome. *Genetics* **211**: 333-348.

Charlesworth B. 1978. Model for evolution of Y chromosomes and dosage compensation. *Proc National Acad Sci* **75**: 5618-5622.

Connallon T, Clark AG. 2010. Gene duplication, gene conversion and the evolution of the Y chromosome. *Genetics* **186**: 277-286.

Cortez D, Cortez D, Marin R, Marin R, Toledo-Flores D, Toledo-Flores D, Froidevaux L, Froidevaux L, Liechti A, Liechti A, et al. 2014. Origins and functional evolution of Y chromosomes across mammals. *Nature* **508**: 488-493.

Davis JK, Thomas PJ, Program N, Thomas JW. 2010. A W-linked palindrome and gene conversion in New World sparrows and blackbirds. *Chromosome Research* **18**: 543-553.

Dudchenko O, Batra SS, Omer AD, Nyquist SK, Hoeger M, Durand NC, Shamim MS, Machol I, Lander ES, Aiden A, et al. 2017. De novo assembly of the *Aedes aegypti* genome using Hi-C yields chromosome-length scaffolds. *Science* **356**: 92–95.

Durand NC, Robinson JT, Shamim MS, Machol I, Mesirov JP, Lander ES, Aiden E. 2016a. Juicebox provides a visualization system for Hi-C contact Maps with unlimited zoom. *Cell Syst* **3**: 99-101.

Durand NC, Shamim MS, Machol I, Rao S, Huntley MH, Lander ES, Aiden E. 2016b. Juicer provides a one-click system for analyzing loop-resolution Hi-C experiments. *Cell Syst* **3**: 95–98.

Ellison C, Bachtrog D. 2019. Recurrent gene co-amplification on Drosophila X and Y chromosomes. *PLOS Genetics* **15**: e1008251.

Ewing B, Green P. 1998. Base-calling of automated sequencer traces using Phred. II. Error probabilities. *Genome Res* **8**: 186–194.

Ewing B, Hillier L, Wendl MC, Green P. 1998. Base-calling of automated sequencer traces using Phred. I. Accuracy assessment. *Genome Res* **8**: 175–185.

Ferris P, Olson BJ, Hoff PL, Douglass S, Casero D, Prochnik S, Geng S, Rai R, Grimwood J, Schmutz J, et al. 2010. Evolution of an expanded sex-determining locus in *Volvox*. *Science* **328**: 351–354.

Firth HV, Richards SM, Bevan PA, Clayton S, Corpas M, Rajan D, Vooren S, Moreau Y, Pettett RM, Carter NP. 2009. DECIPHER: database of chromosomal imbalance and phenotype in humans using Ensembl resources. *Am J Hum Genetics* **84**: 524–533.

Glazer AM, Killingbeck EE, Mitros T, Rokhsar DS, Miller CT. 2015. Genome assembly improvement and mapping convergently evolved skeletal traits in sticklebacks with genotyping-by-sequencing. *G3* **5**: 1463-1472.

Gordon D, Abajian C, Green P. 1998. Consed: A graphical tool for sequence finishing. *Genome Res* **8**: 195–202.

Griffin DK. 2012. Is the Y chromosome disappearing?—Both sides of the argument. *Chromosome Res* **20**: 35–45.

Guo B, Chain FJ, Bornberg-Bauer E, Leder EH, Merilä J. 2013. Genomic divergence between nine- and three-spined sticklebacks. *BMC Genomics* **14**: 756.

Gvozdev VA, Kogan GL, Usakin LA. 2005. The Y chromosome as a target for acquired and amplified genetic material in evolution. *Bioessays* **27**: 1256–1262.

Hallast P, Balaresque P, Bowden GR, Ballereau S, Jobling MA. 2013. Recombination dynamics of a human Y-chromosomal palindrome: rapid GC-biased gene conversion, multi-kilobase conversion tracts, and rare inversions. *PLoS Genetics* **9**: e1003666.

Hartley G, O'Neill RJ. 2019. Centromere repeats: hidden gems of the genome. *Genes* **10**: 223.

Hattori RS, Murai Y, Oura M, Masuda S, Majhi SK, Sakamoto T, Fernandino JI, moza G, Yokota M, Strüssmann CA. 2012. A Y-linked anti-Müllerian hormone duplication takes over a critical role in sex determination. *Proc National Acad Sci* **109**: 2955-2959.

Henikoff S, Ahmad K, Malik HS. 2001. The centromere paradox: stable inheritance with rapidly evolving DNA. *Science* **293**: 1098-1102.

Holt C, Yandell M. 2011. MAKER2: an annotation pipeline and genome-database management tool for second-generation genome projects. *BMC bioinformatics* **12**: 491.

Huang N, Lee I, Marcotte EM, Hurles ME. 2010. Characterising and predicting haploinsufficiency in the human genome. *PLoS Genetics* **6**: e1001154.

Hughes JF, Skaletsky H, Brown LG, Pyntikova T, Graves T, Fulton RS, Dugan S, Ding Y, Buhay CJ, Kremitzki C, et al. 2012. Strict evolutionary conservation followed rapid gene loss on human and rhesus Y chromosomes. *Nature* **483**: 82-86.

Hughes JF, Skaletsky H, Pyntikova T, Graves TA, van Daalen SK, Minx PJ, Fulton RS, McGrath SD, Locke DP, Friedman C, et al. 2010. Chimpanzee and human Y chromosomes are remarkably divergent in structure and gene content. *Nature* **463**: 536-539.

Jain M, Olsen HE, Turner DJ, Stoddart D, Bulazel KV, Paten B, Haussler D, Willard HF, Akeson M, Miga KH. 2018. Linear assembly of a human centromere on the Y chromosome. *Nat Biotechnol* **36**: 321.

Janečka JE, Davis BW, Ghosh S, Paria N, Das PJ, Orlando L, Schubert M, Nielsen MK, Stout TA, Brashear W, et al. 2018. Horse Y chromosome assembly displays unique evolutionary features and putative stallion fertility genes. *Nat Communications* **9**: 2945.

Jeffries DL, Lavanchy G, Sermier R, dl MJ, Miura I, Borzée A, Barrow LN, Canestrelli D, Crochet P-A, Dufresnes C, et al. 2018. A rapid rate of sex-chromosome turnover and non-random transitions in true frogs. *Nature Communications* **9**: 4088.

Jones FC, Grabherr MG, Chan Y, Russell P, Mauceli E, Johnson J, Swofford R, Pirun M, Zody MC, White S, et al. 2012. The genomic basis of adaptive evolution in threespine sticklebacks. *Nature* **484**: 55-61.

Kamiya T, Kai W, Tasumi S, Oka A, Matsunaga T, Mizuno N, Fujita M, Suetake H, Suzuki S, Hosoya S, et al. 2012. A trans-species missense SNP in *Amhr2* is associated with sex determination in the tiger pufferfish, *Takifugu rubripes* (Fugu). *PLoS Genetics* **8**: e1002798.

Kim D, Pertea G, Trapnell C, Pimentel H, Kelley R, Salzberg SL. 2013. TopHat2: accurate alignment of transcriptomes in the presence of insertions, deletions and gene fusions. *Genome Biology* **14**: R36.

Kingsley D, Zhu B, Osoegawa K, Jong PJ, Schein J, Marra M, Peichel CL, Amemiya C, Schluter D, Balabhadra S, et al. 2004. New genomic tools for molecular studies of evolutionary change in threespine sticklebacks. *Behaviour* **141**: 1331-1344.

Kingsley DM, Peichel CL. 2006. The molecular genetics of evolutionary change in sticklebacks. *Biology of the Three-Spined Stickleback* 41-81.

Kitano J, Peichel CL. 2012. Turnover of sex chromosomes and speciation in fishes. *Environ Biol Fish* **94**: 549-558.

Kitano J, Ross JA, Mori S, Kume M, Jones FC, Chan YF, Absher DM, Grimwood J, Schmutz J, Myers RM, et al. 2009. A role for a neo-sex chromosome in stickleback speciation. *Nature* **461**: 1079-1083.

Koren S, Walenz BP, Berlin K, Miller JR, Bergman NH, Phillippy AM. 2017. Canu: scalable and accurate long-read assembly via adaptive k-mer weighting and repeat separation. *Genome Res* **27**: 722-736.

Korf I. 2004. Gene finding in novel genomes. *Bmc Bioinformatics* **5**: 59.

Kurtz S, Phillippy A, Delcher AL, Smoot M, Shumway M, Antonescu C, Salzberg SL. 2004. Versatile and open software for comparing large genomes. *Genome Biol* **5**: R12.

Lahn BT, Page DC. 1999. Retroposition of autosomal mRNA yielded testis-specific gene family on human Y chromosome. *Nat Genet* **21**: 429-433.

Lange J, Yamada S, Tischfield SE, Pan J, Kim S, Zhu X, Socci ND, Jasin M, Keeney S. 2016. The landscape of mouse meiotic double-strand break formation, processing, and repair. *Cell* **167**: 695-708.

Langmead B, Salzberg SL. 2012. Fast gapped-read alignment with Bowtie 2. *Nature methods* **9**: 357-359.

Lewis ZR, McClellan MC, Postlethwait JH, Cresko WA, Kaplan RH. 2008. Female-specific increase in primordial germ cells marks sex differentiation in threespine stickleback (*Gasterosteus aculeatus*). *Journal of morphology* **269**: 909-921.

Li G, Davis BW, Raudsepp T, Wilkerson AJ, Mason VC, Ferguson-Smith M, O'Brien PC, Waters PD, Murphy WJ. 2013. Comparative analysis of mammalian Y chromosomes illuminates ancestral structure and lineage-specific evolution. *Genome Res* **23**: 1486-1495.

Li M, Sun Y, Zhao J, Shi H, Zeng S, Ye K, Jiang D, Zhou L, Sun L, Tao W, et al. 2015. A Tandem duplicate of anti-müllerian hormone with a missense SNP on the Y chromosome is essential for male sex determination in Nile tilapia, *Oreochromis niloticus*. *Plos Genet* **11**: e1005678.

Long M, VanKuren NW, Chen S, Vibranovski MD. 2013. New gene evolution: little did we know. *Annual review of genetics* **47**: 307-33.

Mahajan S, Bachtrog D. 2017. Convergent evolution of Y chromosome gene content in flies. *Nature communications* **8**: 785.

Mahajan S, Wei K, Nalley MJ, Gibilisco L, Bachtrog D. 2018. De novo assembly of a young *Drosophila* Y chromosome using single-molecule sequencing and chromatin conformation capture. *PLOS Biology* **16**: e2006348.

Malik HS, Henikoff S. 2002. Conflict begets complexity: the evolution of centromeres. *Curr Opin Genet Dev* **12**: 711-718.

Manuelidis L. 1978. Chromosomal localization of complex and simple repeated human DNAs. *Chromosoma* **66**: 23-32.

Marais GA, Marais G, Campos P, Campos PR, Gordo I, Gordo I. 2010. Can intra-Y gene conversion oppose the degeneration of the human Y chromosome? A simulation study. *Genome biology and evolution* **2**: 347-357.

McNulty SM, Sullivan BA. 2018. Alpha satellite DNA biology: finding function in the recesses of the genome. *Chromosome Res* **26**: 115–138.

Melters DP, Bradnam KR, Young HA, Telis N, May MR, Ruby GJ, Sebra R, Peluso P, Eid J, Rank D, et al. 2013. Comparative analysis of tandem repeats from hundreds of species reveals unique insights into centromere evolution. *Genome Biology* **14**: R10.

Miga KH, Newton Y, Jain M, Altemose N, Willard HF, Kent JW. 2014. Centromere reference models for human chromosomes X and Y satellite arrays. *Genome Res* **24**: 697–707.

Moens P, Chen D, Shen Z, Kolas N, Tarsounas M, Heng H, Spyropoulos B. 1997. Rad51 immunocytology in rat and mouse spermatocytes and oocytes. *Chromosoma* **106**: 207-215.

Murphy WJ, Wilkerson PA, Raudsepp T, Agarwala R, Schäffer AA, Stanyon R, Chowdhary BP. 2006. Novel gene acquisition on carnivore Y chromosomes. *Plos Genet* **2**: e43.

Myosho T, Takehana Y, Hamaguchi S, Sakaizumi M. 2015. Turnover of sex chromosomes in celebensis group medaka fishes. *G3* **5**: 2685-2691.

Pan Q, Feron R, Yano A, Guyomard R, Jouanno E, Vigouroux E, Wen M, Busnel J-M, Bobe J, Concordet J-P, et al. 2019. Identification of the master sex determining gene in Northern pike (*Esox lucius*) reveals restricted sex chromosome differentiation. *Plos Genet* **15**: e1008013.

Papadopulos AS, Chester M, Ridout K, Filatov DA. 2015. Rapid Y degeneration and dosage compensation in plant sex chromosomes. *Proceedings of the National Academy of Sciences of the United States of America*. **112**: 13021-13026.

Paria N, Raudsepp T, Wilkerson AJ, O'Brien PC, Ferguson-Smith MA, Love CC, Arnold C, Rakestraw P, Murphy WJ, Chowdhary BP. 2011. A gene catalogue of the euchromatic male-specific region of the horse Y chromosome: comparison with human and other mammals. *Plos One* **6**: e21374.

Peichel CL, Ross JA, Matson CK, Dickson M, Grimwood J, Schmutz J, Myers RM, Mori S, Schluter D, Kingsley DM. 2004. The master sex-determination locus in threespine sticklebacks is on a nascent Y chromosome. **14**: 1416 -1424.

Peichel CL, Sullivan ST, Liachko I, White MA. 2017. Improvement of the threespine stickleback genome using a Hi-C-based proximity-guided assembly. *Journal of Heredity* **108**: 693-700.

Peneder P, Wallner B, Vogl C. 2017. Exchange of genetic information between therian X and Y chromosome gametologs in old evolutionary strata. *Ecol Evol* **7**: 8478-8487.

Pertile MD, Graham AN, Choo KH, Kalitsis P. 2009. Rapid evolution of mouse Y centromere repeat DNA belies recent sequence stability. *Genome Res* **19**: 2202–2213.

Quinlan AR, Hall IM. 2010. BEDTools: a flexible suite of utilities for comparing genomic features. *Bioinformatics* **26**: 841–842.

Rice W. 1987. Genetic hitchhiking and the evolution of reduced genetic activity of the Y sex chromosome. *Genetics* **116**: 161-167.

- Roberts A, Pimentel H, Trapnell C, Pachter L. 2011. Identification of novel transcripts in annotated genomes using RNA-Seq. *Bioinformatics* **27**: 2325–2329.
- Robinson MD, McCarthy DJ, Smyth GK. 2010. edgeR: a Bioconductor package for differential expression analysis of digital gene expression data. *Bioinformatics* **26**: 139-140.
- Roesti M, Moser D, Berner D. 2013. Recombination in the threespine stickleback genome—patterns and consequences. *Molecular Ecology* **22**: 3014-3027.
- Ross JA, Peichel CL. 2008. Molecular cytogenetic evidence of rearrangements on the Y chromosome of the threespine stickleback fish. *Genetics* **179**: 2173-2182.
- Ross JA, Urton JR, Boland J, Shapiro MD, Peichel CL. 2009. Turnover of sex chromosomes in the stickleback fishes (gasterosteidae). *PLoS Genetics* **5**: e1000391.
- Rozen S, Skaletsky H, Marszalek JD, Minx PJ, Cordum HS, Waterston RH, Wilson RK, Page DC. 2003. Abundant gene conversion between arms of palindromes in human and ape Y chromosomes. *Nature* **423**: 873-876.
- Sasaki M, Lange J, Keeney S. 2010. Genome destabilization by homologous recombination in the germ line. *Nat Rev Mol Cell Bio* **11**: 182-195.
- Saxena R, Brown LG, Hawkins T, Alagappan RK, Skaletsky H, Reeve M, Reijo R, Rozen S, Dinulos M, Disteche CM, et al. 1996. The DAZ gene cluster on the human Y chromosome arose from an autosomal gene that was transposed, repeatedly amplified and pruned. *Nat Genet* **14**: 292.
- Simão FA, Waterhouse RM, Ioannidis P, Kriventseva EV, Zdobnov EM. 2015. BUSCO: assessing genome assembly and annotation completeness with single-copy orthologs. *Bioinformatics* **31**: 3210–3212.
- Skaletsky H, Kuroda-Kawaguchi T, Minx PJ, Cordum HS, Hillier L, Brown LG, Repping S, Pyntikova T, Ali J, Bieri T, et al. 2003. The male-specific region of the human Y chromosome is a mosaic of discrete sequence classes. *Nature* **423**: 825-837.
- Skinner BM, Sargent CA, Churcher C, Hunt T, Herrero J, Loveland JE, Dunn M, Louzada S, Fu B, Chow W, et al. 2016. The pig X and Y Chromosomes: structure, sequence, and evolution. *Genome Res* **26**: 130–139.
- Smit A, Hubley R, Green P. 2013. RepeatMasker Open-4.0. <http://www.repeatmasker.org>.
- Soh SY, Alföldi J, Pyntikova T, Brown LG, Graves T, Minx PJ, Fulton RS, Kremitzki C, Koutseva N, Mueller JL, et al. 2014. Sequencing the mouse Y chromosome reveals convergent gene acquisition and amplification on both sex chromosomes. *Cell* **159**: 800-813.
- Stanke M, Tzvetkova A, Morgenstern B. 2006. AUGUSTUS at EGASP: using EST, protein and genomic alignments for improved gene prediction in the human genome. *Genome Biol* **7 Suppl 1**: S11.1 8.
- Swarup H. 1958. Stages in the development of the stickleback *Gasterosteus aculeatus* (L.). *Journal Of Embryology And Experimental Morphology* **6**: 373-383.

- Tobler R, Nolte V, Schlötterer C. 2017. High rate of translocation-based gene birth on the *Drosophila* Y chromosome. *Proc National Acad Sci* **114**: 11721–11726.
- Trombetta B, Cruciani F. 2017. Y chromosome palindromes and gene conversion. *Human genetics* **136**: 605-619.
- Urton J, McCann S, Peichel C. 2011. Karyotype differentiation between two stickleback species (*Gasterosteidae*). *Cytogenet Genome Res* **135**: 150-159.
- Varadharajan, Rastas P, Löytynoja A, Matschiner M, Calboli FC, Guo B, Nederbragt AJ, Jakobsen KS, Merilä J. 2019. A high-quality assembly of the nine-spined stickleback (*Pungitius pungitius*) genome. *Genome Biol Evol* **11**: 3291–3308.
- Waterhouse RM, Seppey M, Simão FA, Manni M, Ioannidis P, Klioutchnikov G, Kriventseva EV, Zdobnov EM. 2017. BUSCO applications from quality assessments to gene prediction and phylogenomics. *Mol Biol Evol* **35**: 543-548.
- White MA, Kitano J, Peichel CL. 2015. Purifying selection maintains dosage-sensitive genes during degeneration of the threespine stickleback Y chromosome. *Mol Biol Evol* **32**: 1981-1995.
- Willard H. 1985. Chromosome-specific organization of human alpha satellite DNA. *Am J Hum Genet* **37**: 524–32.
- Wolfe J, Darling SM, Erickson RP, Craig IW, Buckle VJ, Rigby PWJ, Willard HF, Goodfellow PN. 1985. Isolation and characterization of an alphoid centromeric repeat family from the human Y chromosome. *J Mol Biol* **182**: 477–485.
- Zhang Y, Vibranovski, Krinsky B, Long M. 2010a. Age-dependent chromosomal distribution of male-biased genes in *Drosophila*. *Genome Res* **20**: 1526-1533.
- Zhang YE, Vibranovski MD, Landback P, Marais GA, Long M. 2010b. Chromosomal redistribution of male-biased genes in mammalian evolution with two bursts of gene gain on the X chromosome. *PLoS Biology* **8**: e1000494.
- Zhou Q, Zhou Q, Zhang J, Zhang J, Bachtrog D, Bachtrog D, An N, An N, Huang Q, Huang Q, et al. 2014. Complex evolutionary trajectories of sex chromosomes across bird taxa. *Science* **346**: 1246338-1246338.
